# Supplementary material for: Integration of disease association and eQTL data using a Bayesian colocalisation approach highlights six candidate causal genes in immune-mediated diseases
Source: PubMed Central journal article supplement (PMC4498151; doi:10.1093/hmg/ddv077), 2015-03-05
Supplement: supp_ddv077_ddv077supp.pdf [file supp_ddv077_ddv077supp.pdf]

Integration of disease association and eQTL data indicates seven  
candidate causal genes and highlights the role of monocytes in  
immune-mediated diseases  
Supplementary Material

Hui Guo, Mary D Fortune, Oliver S Burren, Ellen Schofield, Neil M Walker,  
John A Todd, Chris Wallace

February 17, 2015

## 1 Manhattan plots

Each plot shows the  $-\log_{10}(p)$  values for disease(s) and expression of gene(s) with evidence of association to each region. To allow visual resolution of distinct signals, points are coloured according to the LD ( $r^2$ ) between the SNP they represent and the index SNP(s) shown in the key.

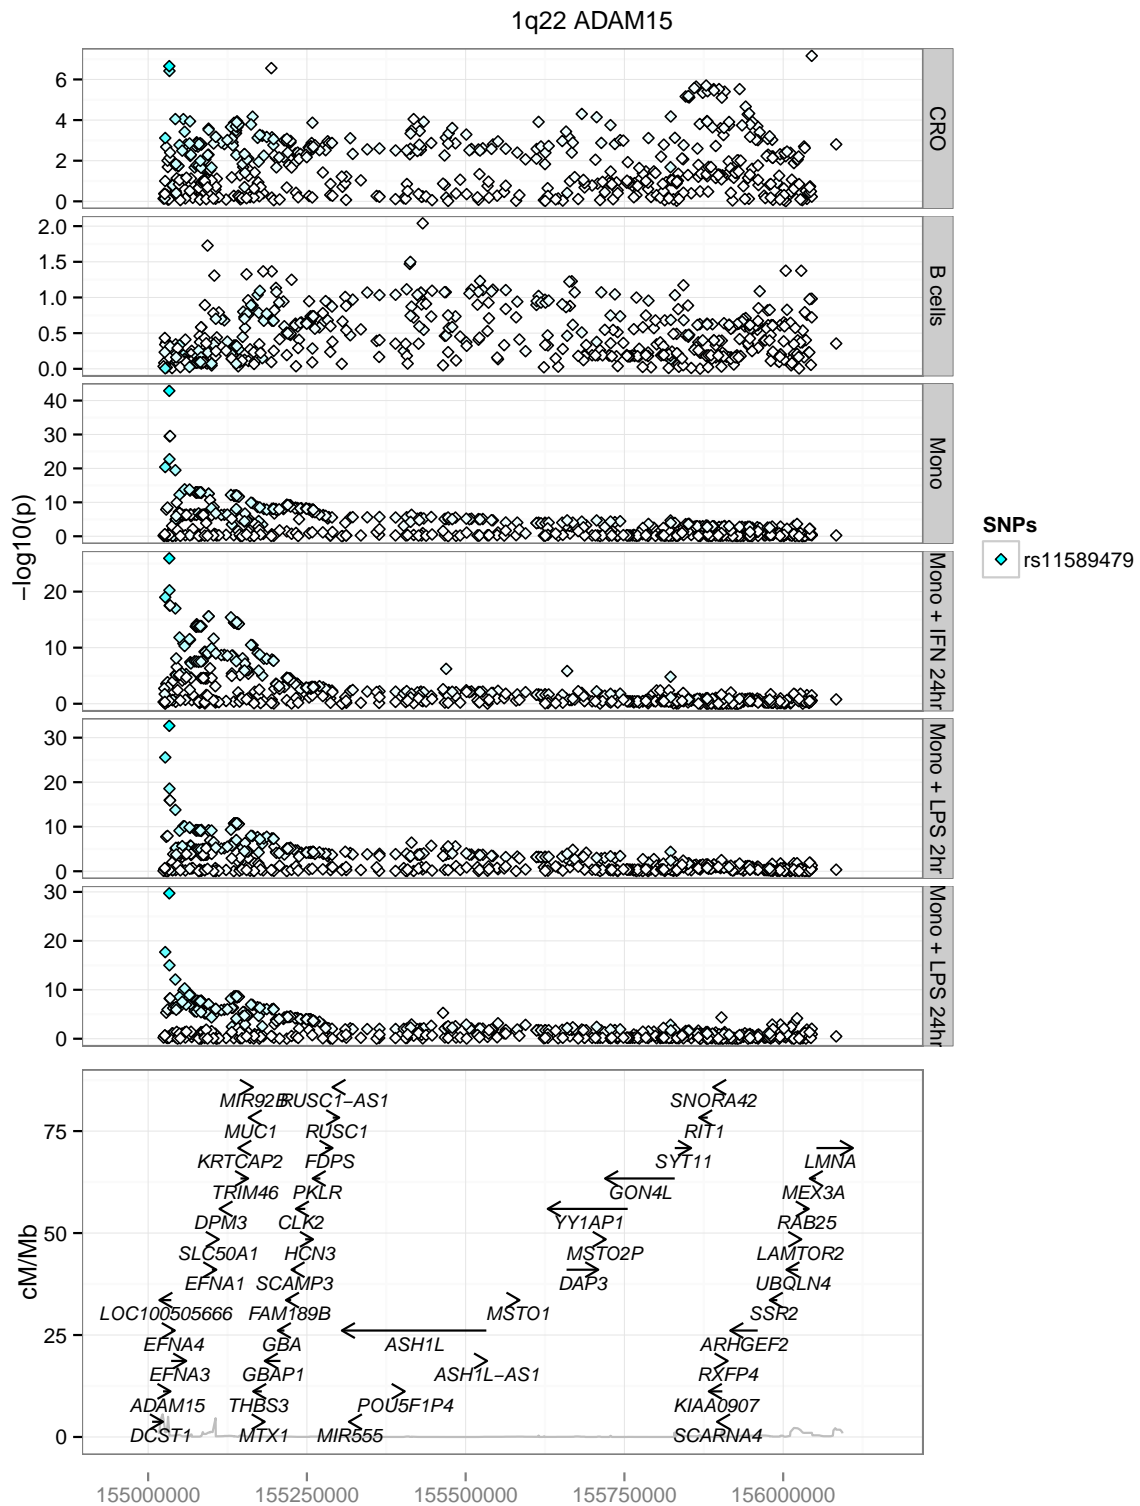

**Supplementary Figure 1.** Chromosome 1q22 expression of *ADAM15* (probe ILMN\_1751500)

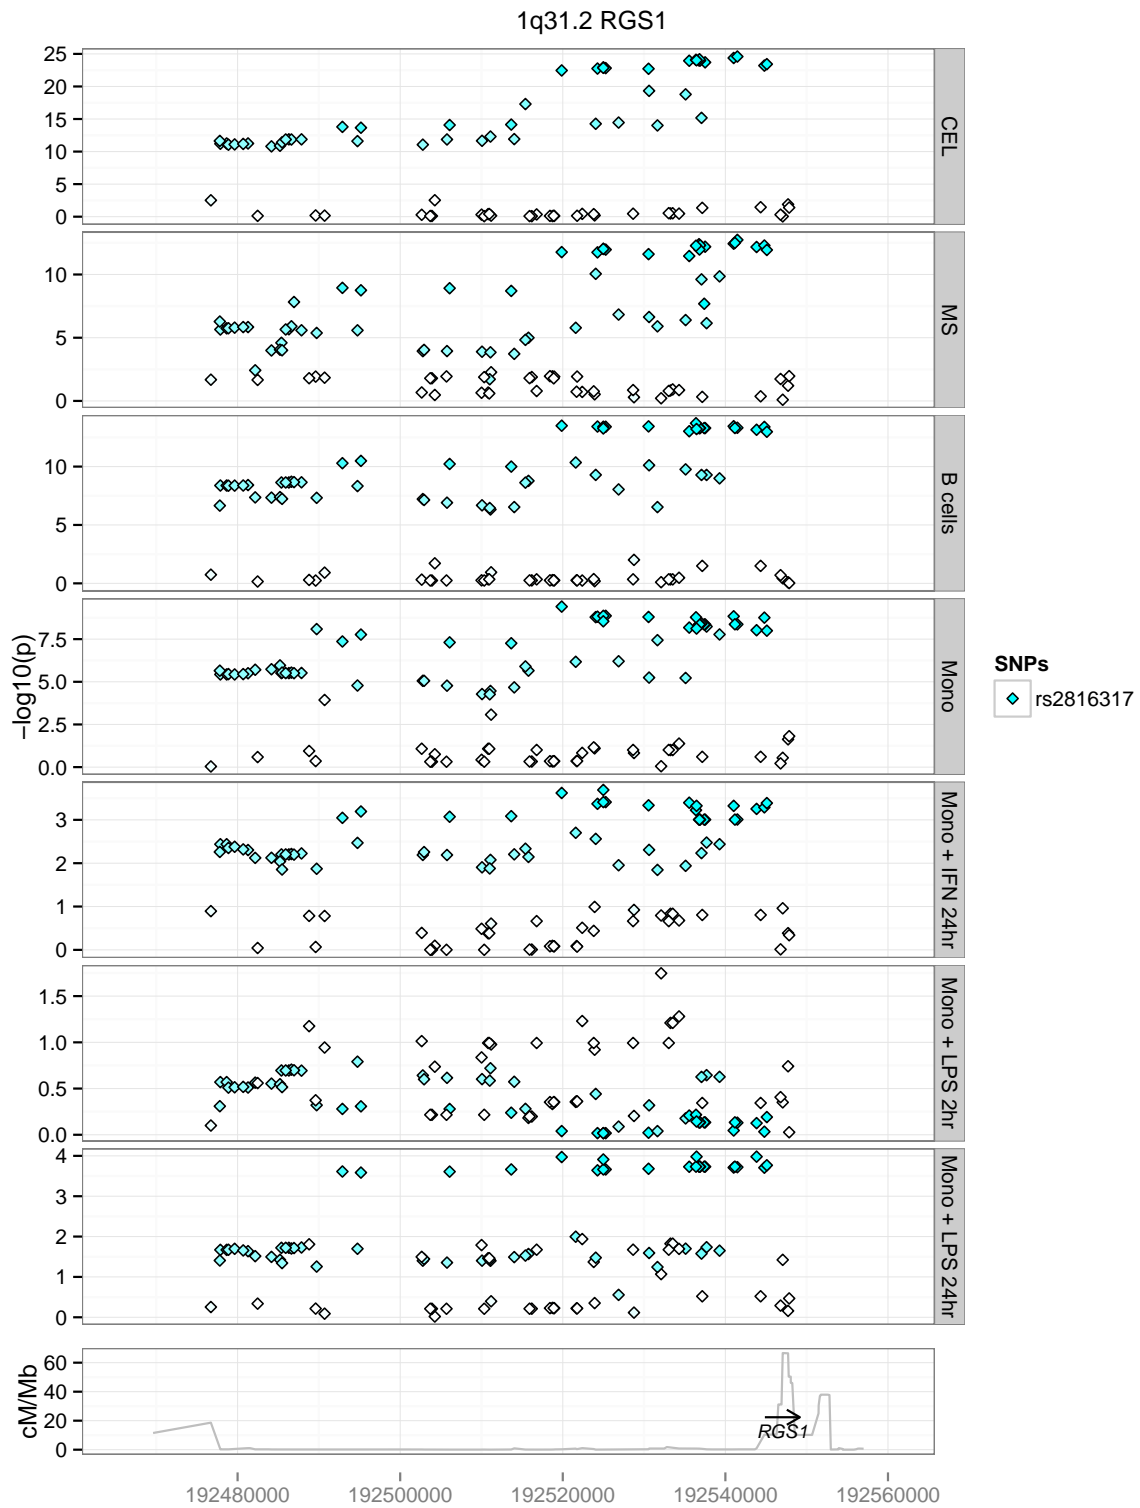

**Supplementary Figure 2.** Chromosome 1q31.2 expression of *RGS1* (probe ILMN\_1656011)

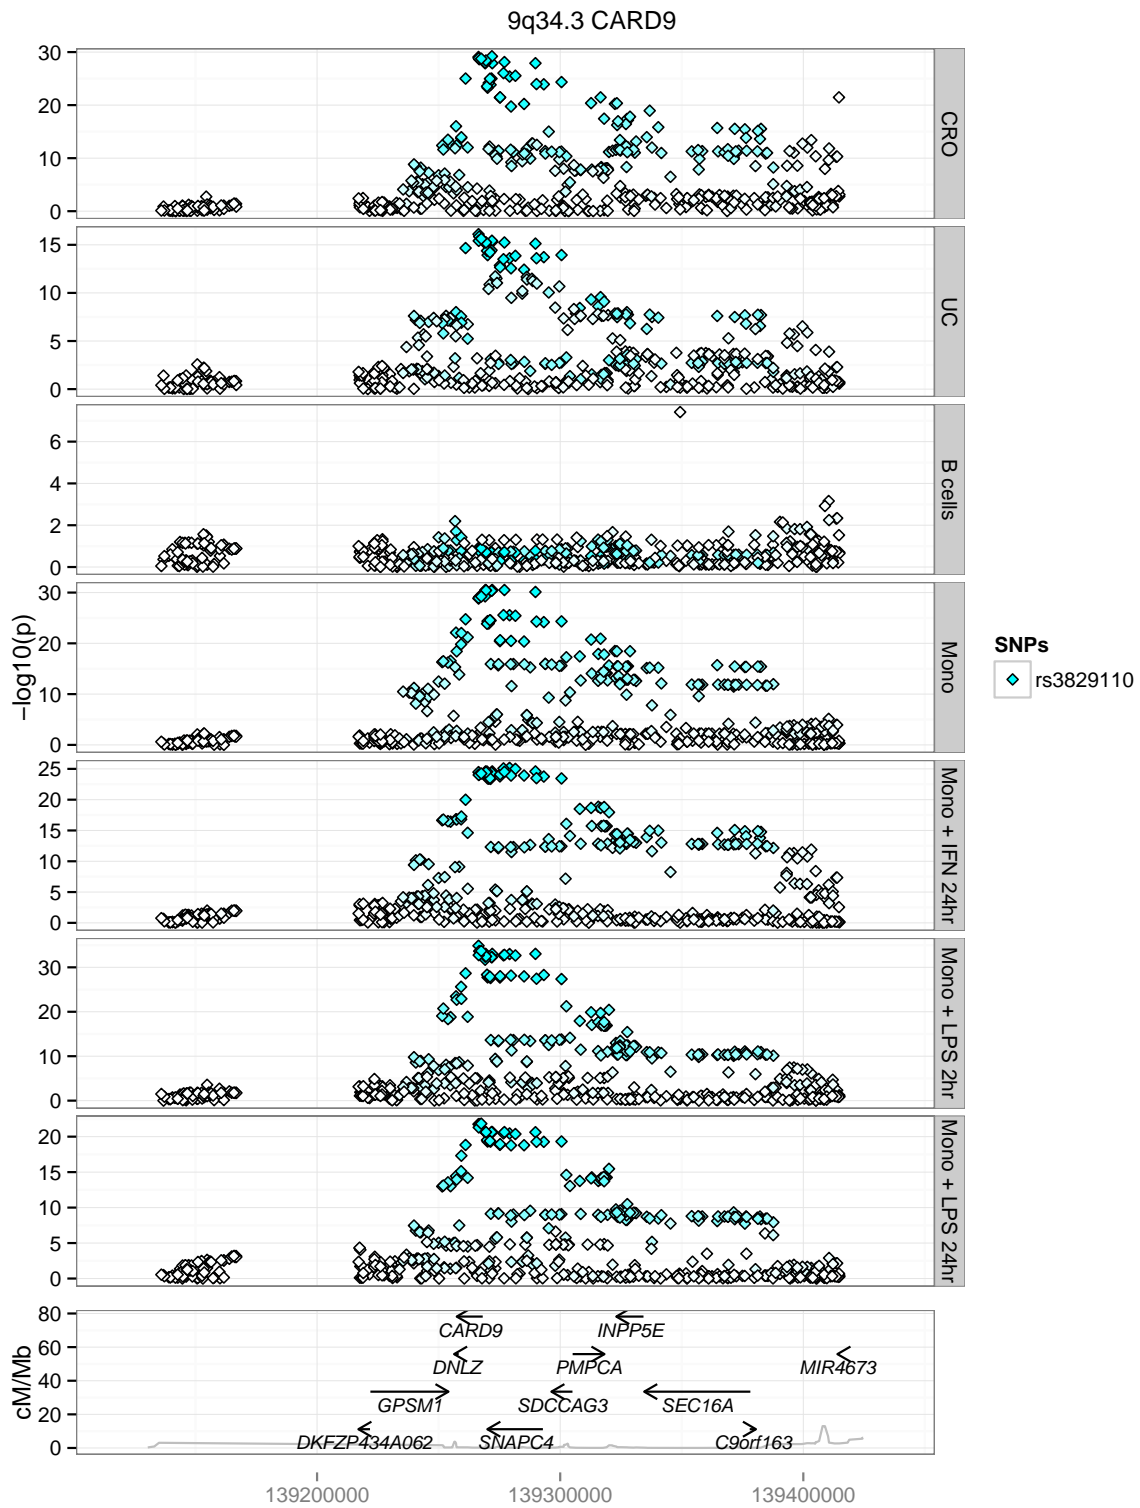

**Supplementary Figure 3.** Chromosome 9q34.3 expression of *CARD9* (probe ILMN\_1712532)

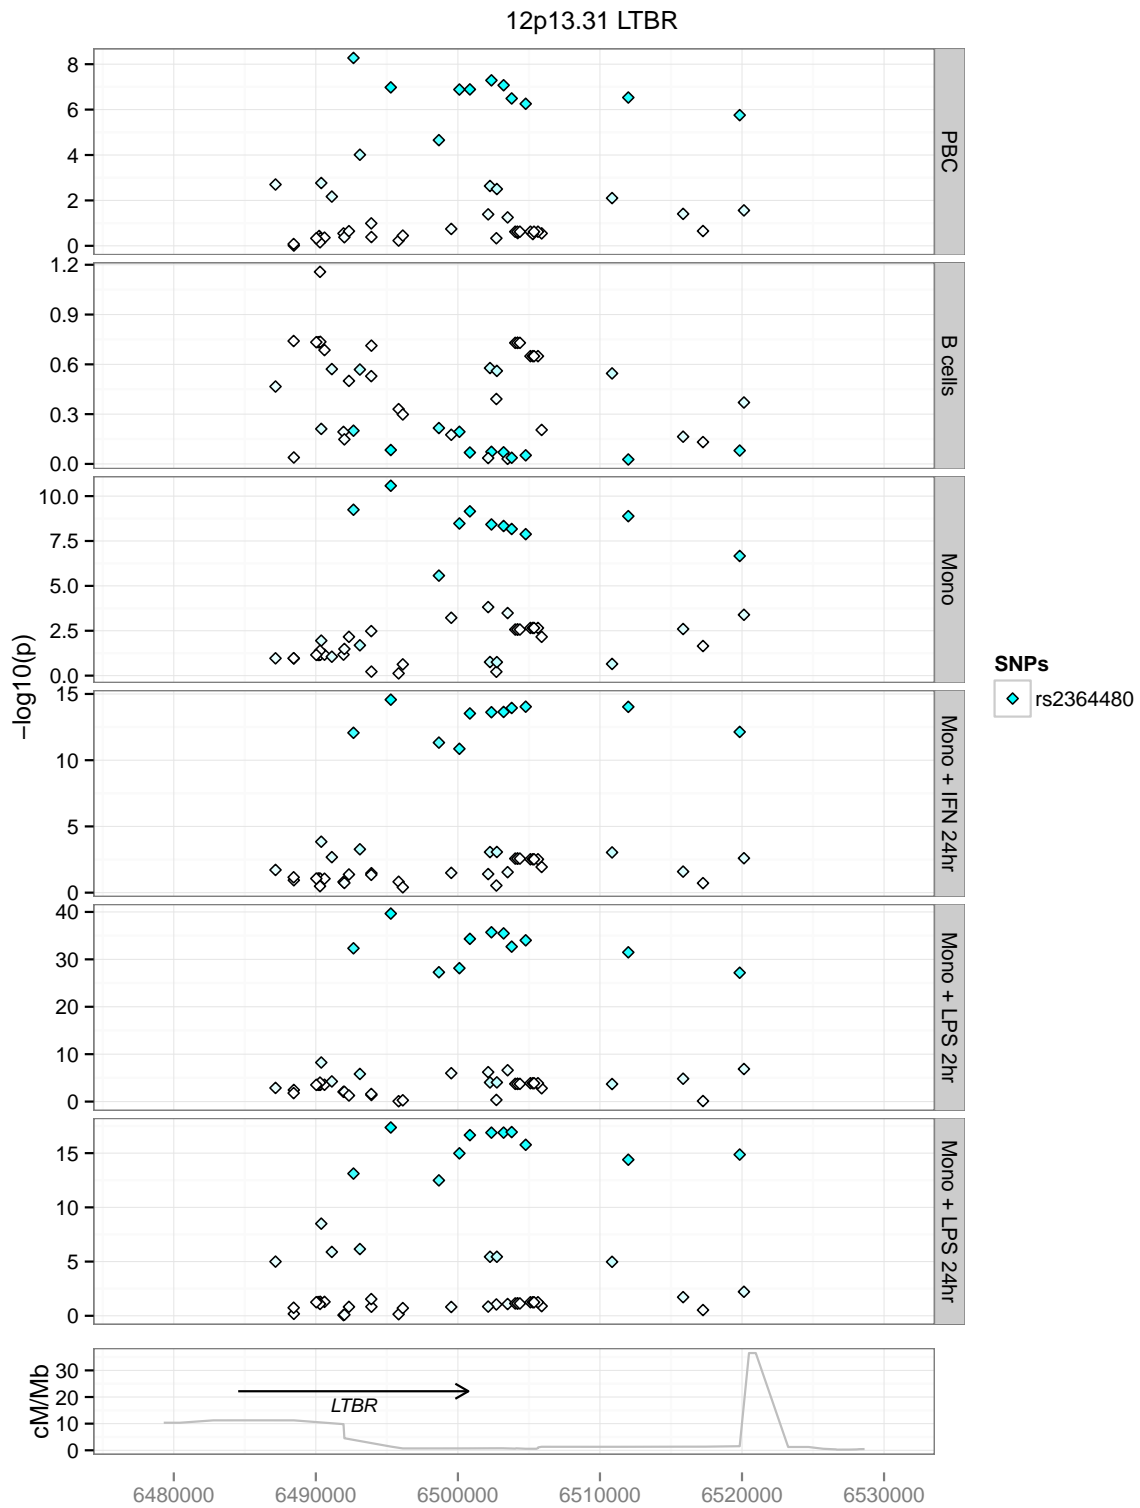

**Supplementary Figure 4.** Chromosome 12p13.31 expression of *LTBR* (probe ILMN\_1667476)

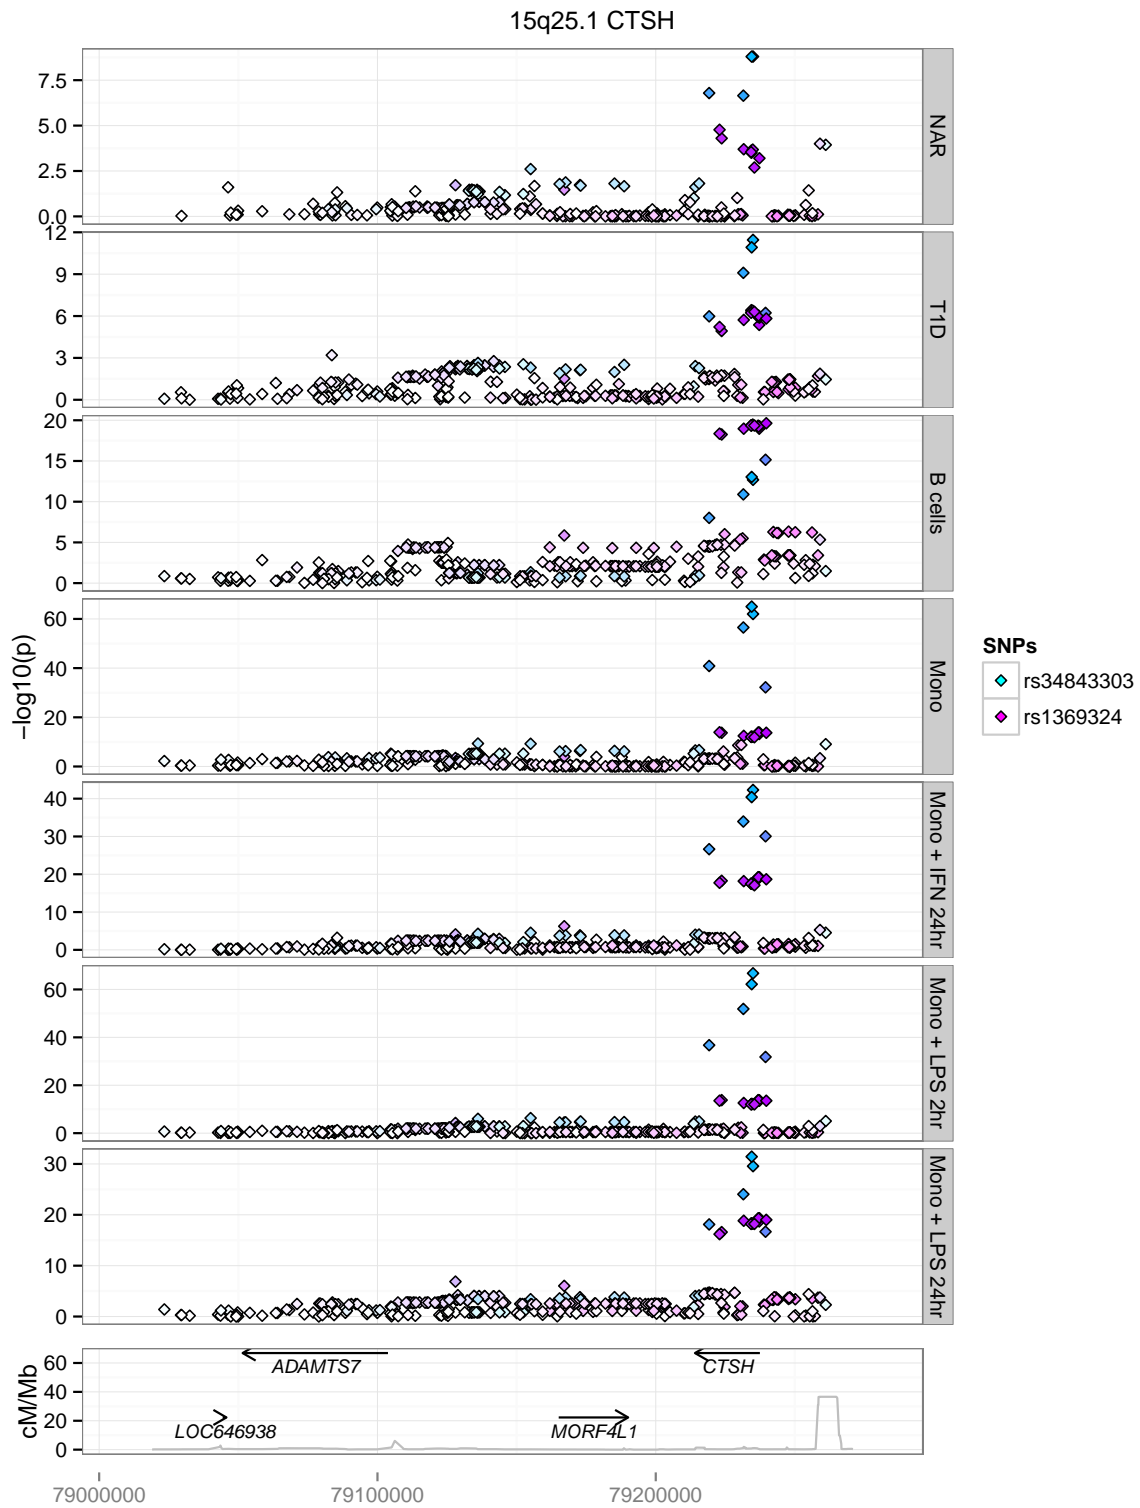

**Supplementary Figure 5.** Chromosome 15q25.1 expression of *CTSH* (probe ILMN\_2390853)

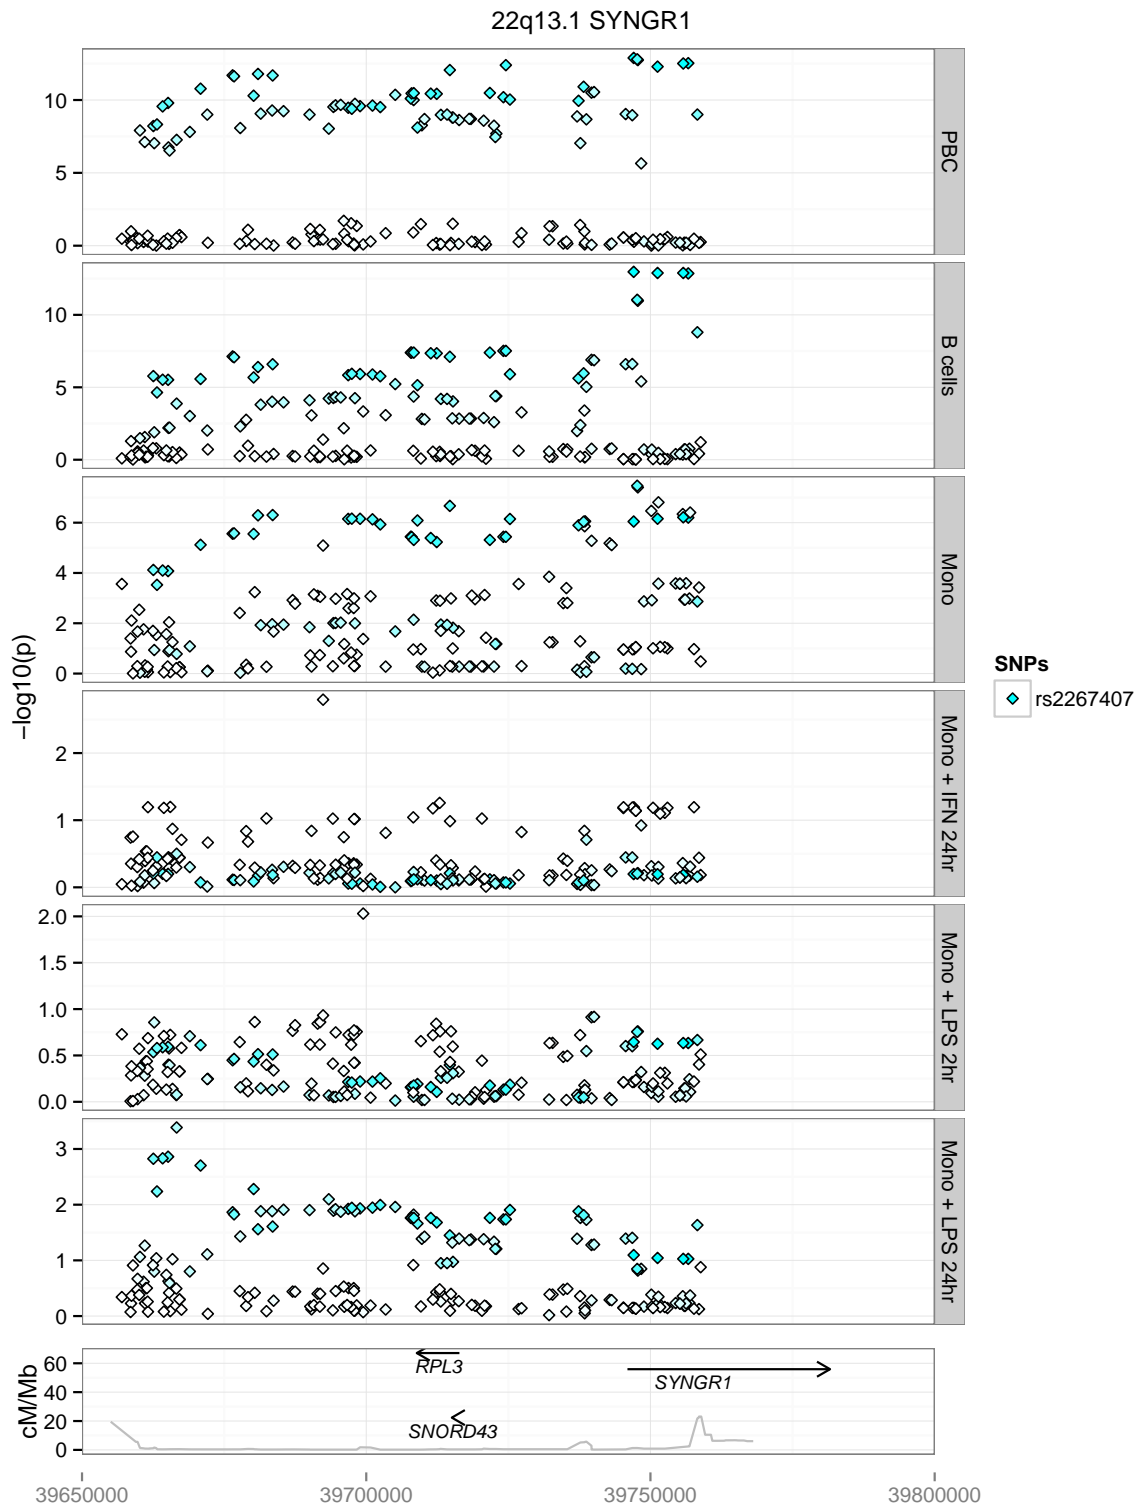

**Supplementary Figure 6.** Chromosome 22q13.1 expression of *SYNGR1* (probe ILMN\_1727805)

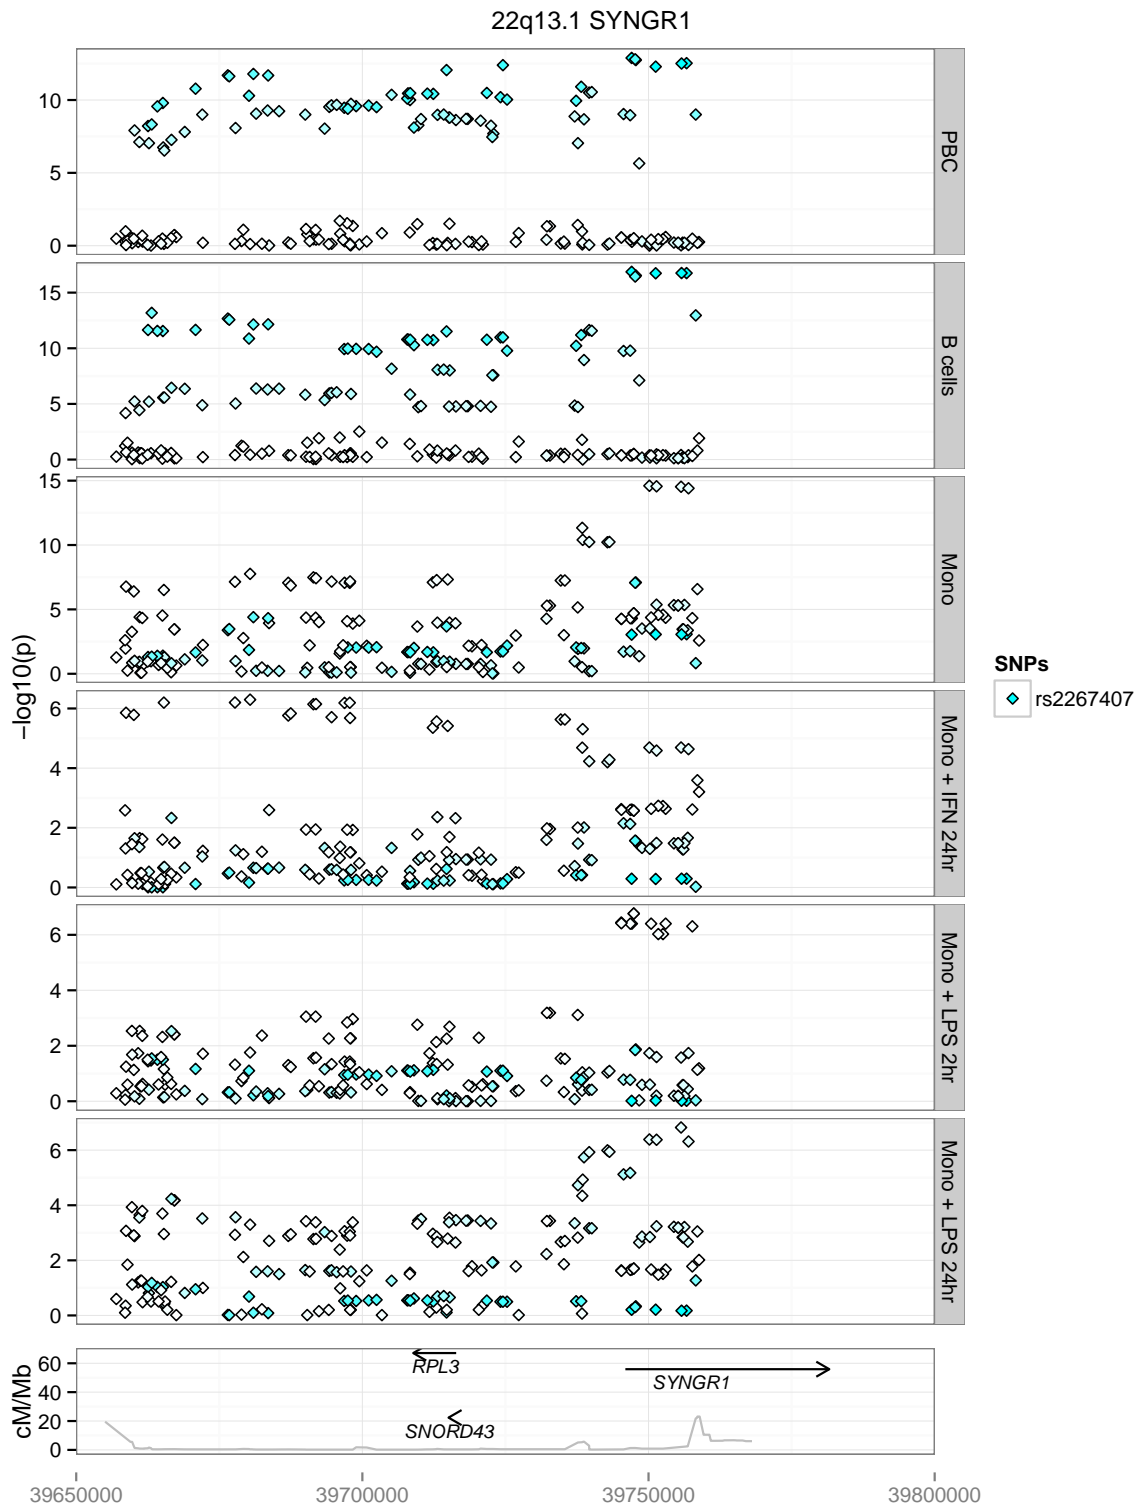

**Supplementary Figure 7.** Chromosome 22q13.1 expression of *SYNGR1* (probe ILMN\_1810875)



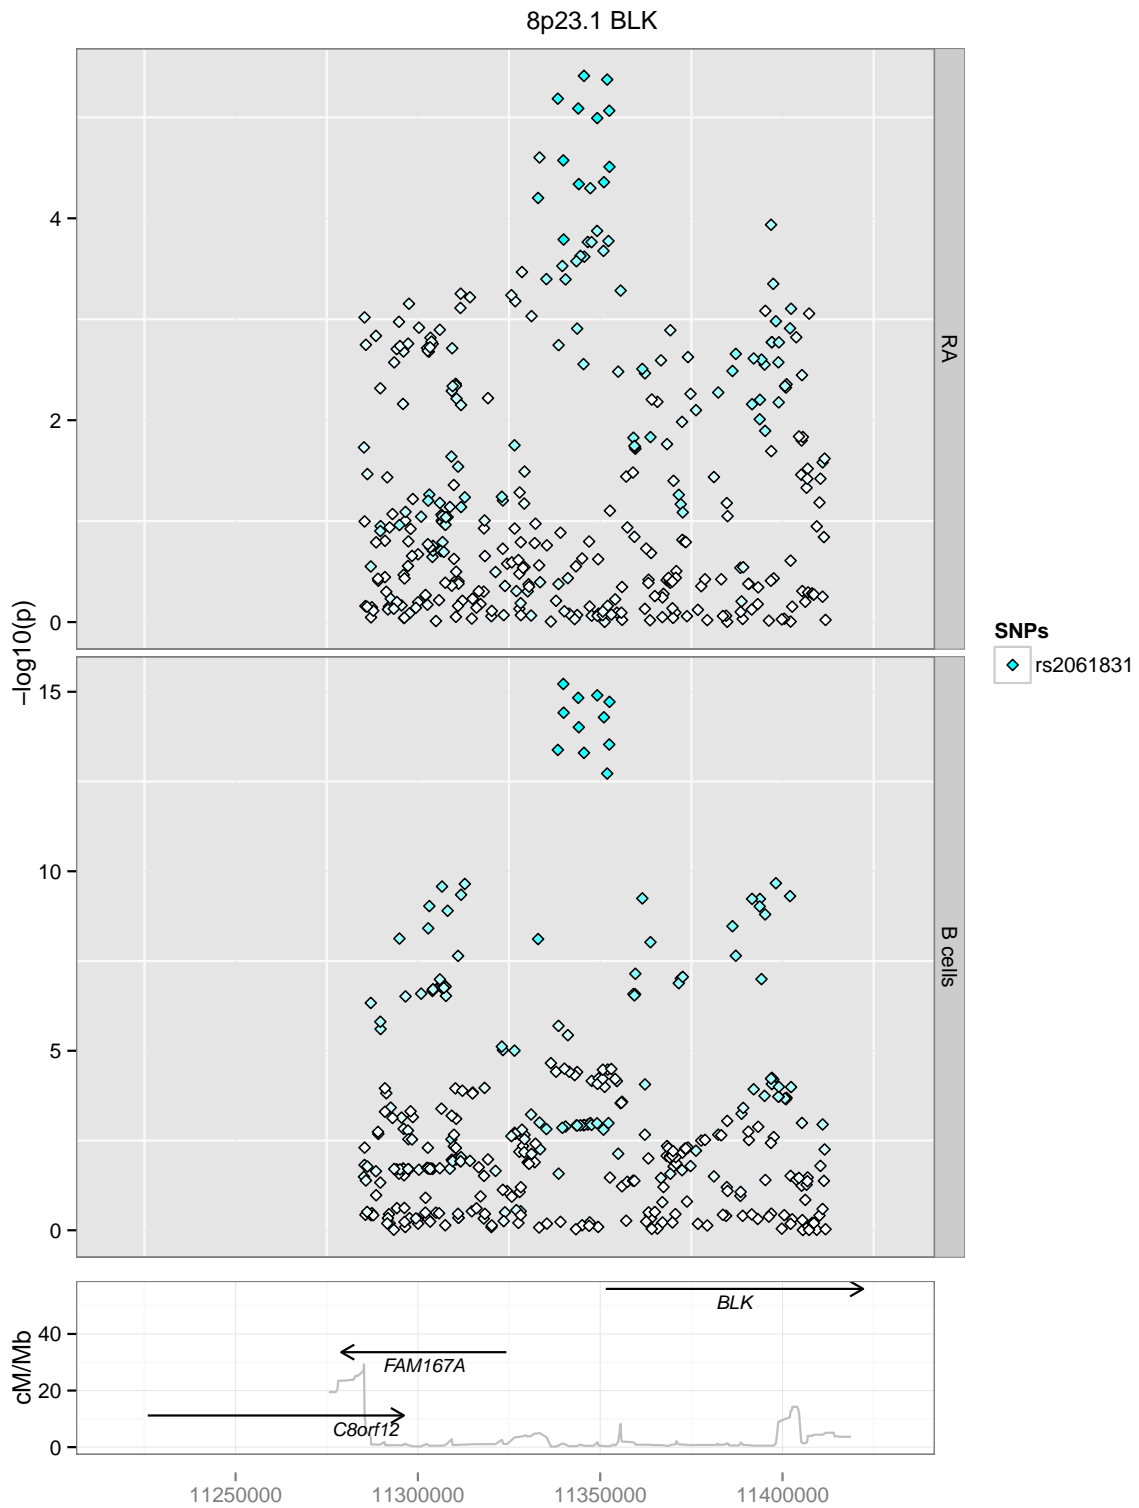

**Supplementary Figure 8.** Chromosome 8p23.1 expression of *BLK* (probe ILMN\_1668277)

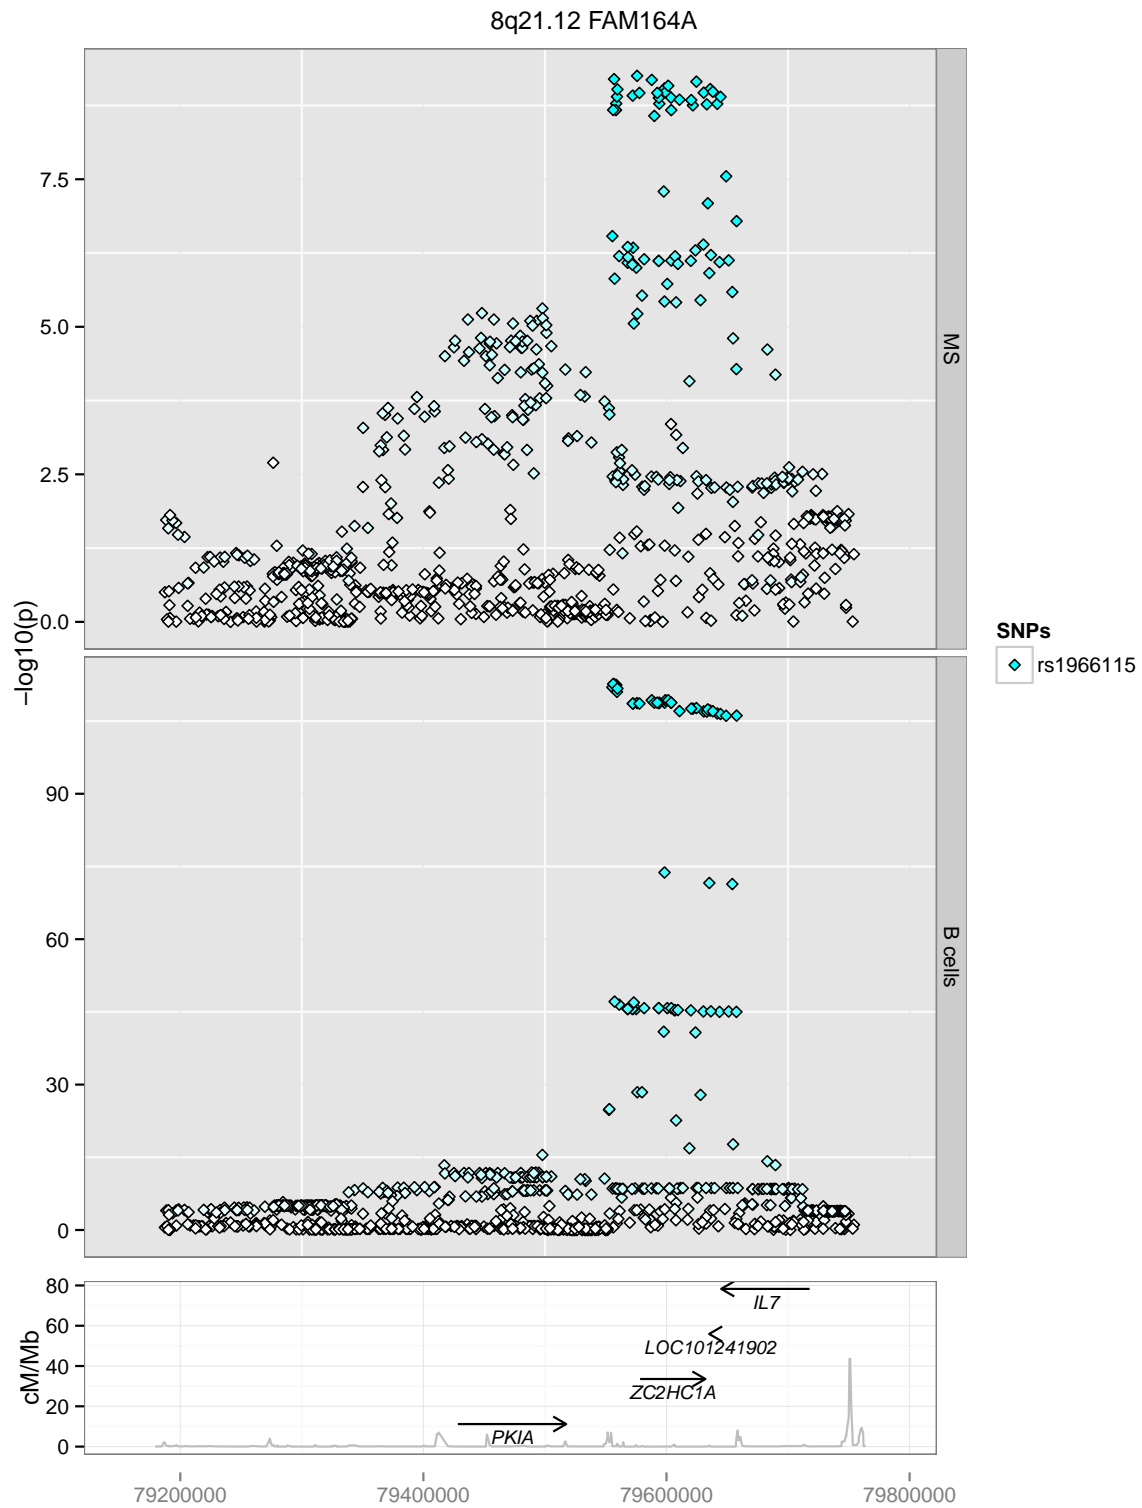

**Supplementary Figure 9.** Chromosome 8q21.12 expression of *FAM164A* (probe ILMN\_1789558)

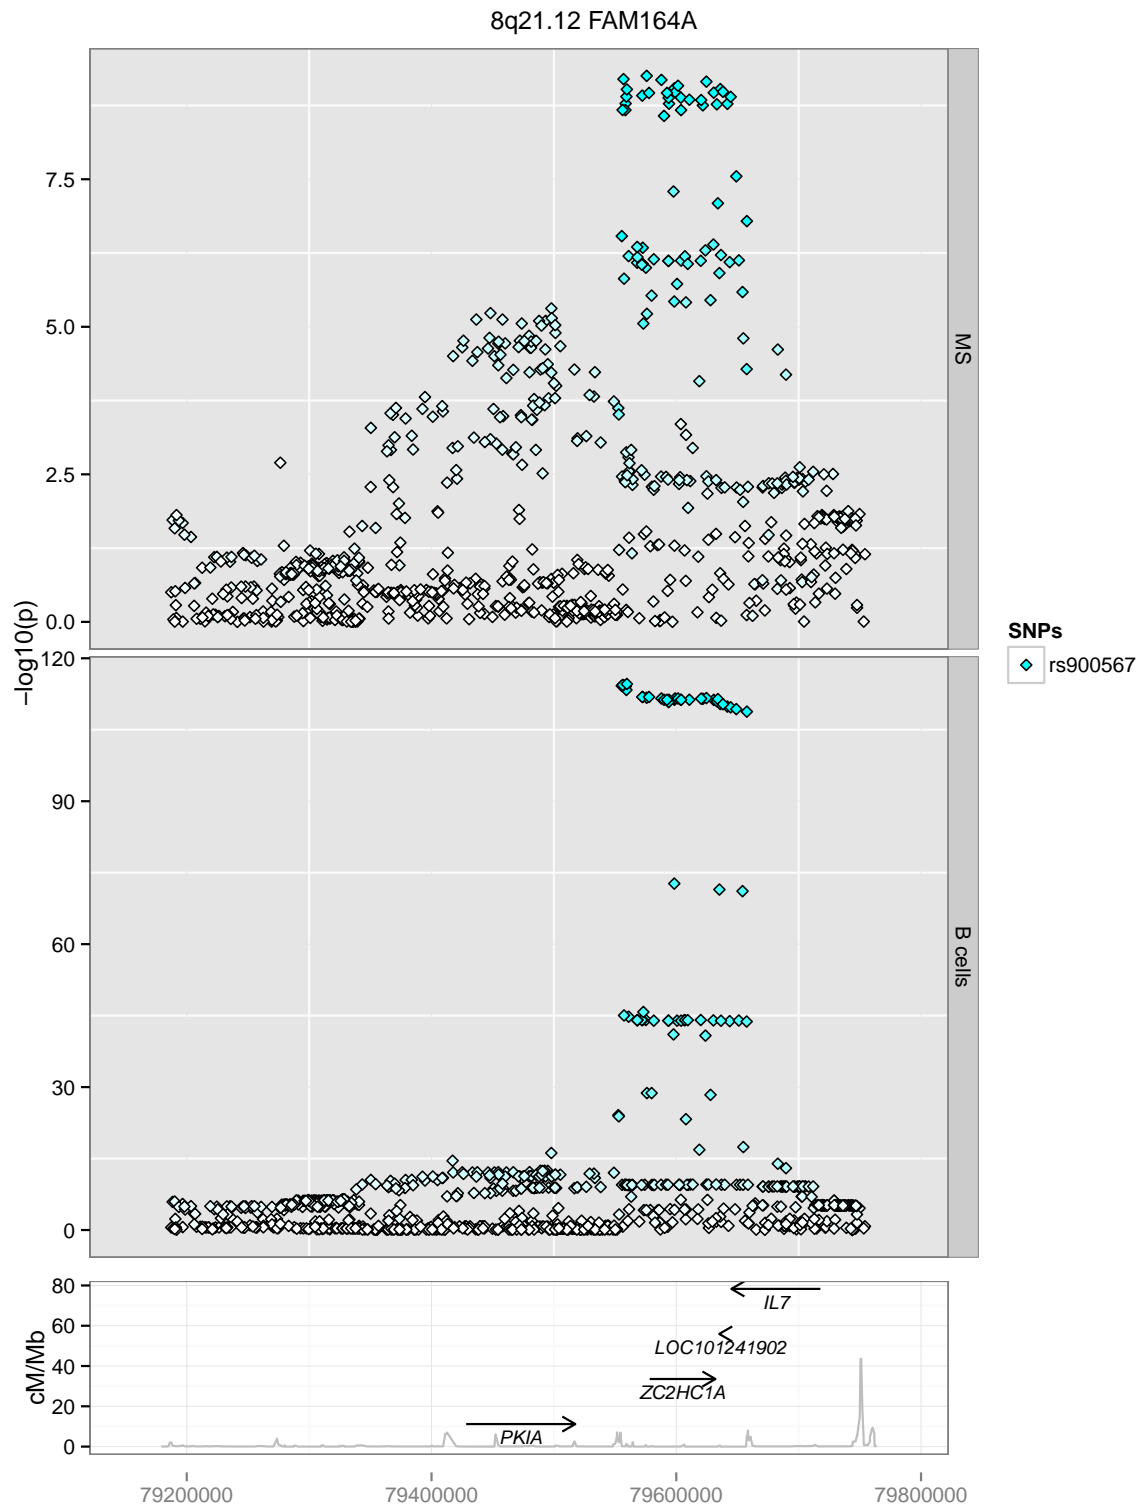

**Supplementary Figure 10.** Chromosome 8q21.12 expression of *FAM164A* (probe ILMN\_2057981)

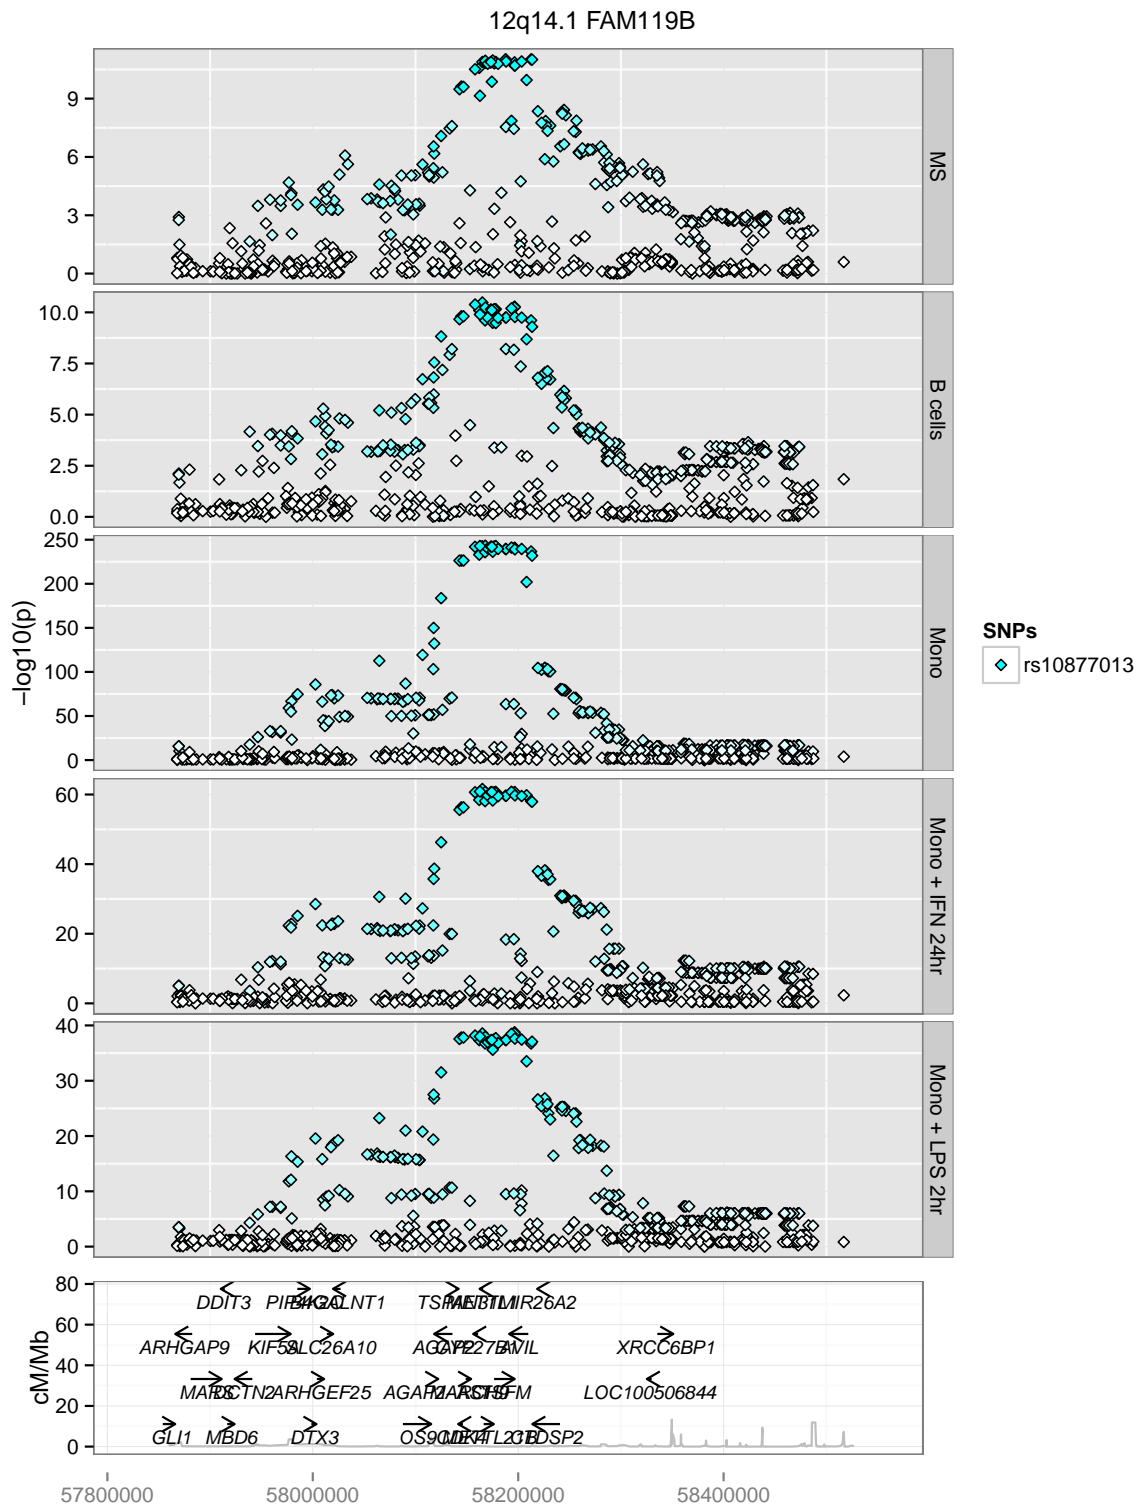

**Supplementary Figure 11.** Chromosome 12q14.1 expression of *FAM119B* (probe ILMN\_1723846)

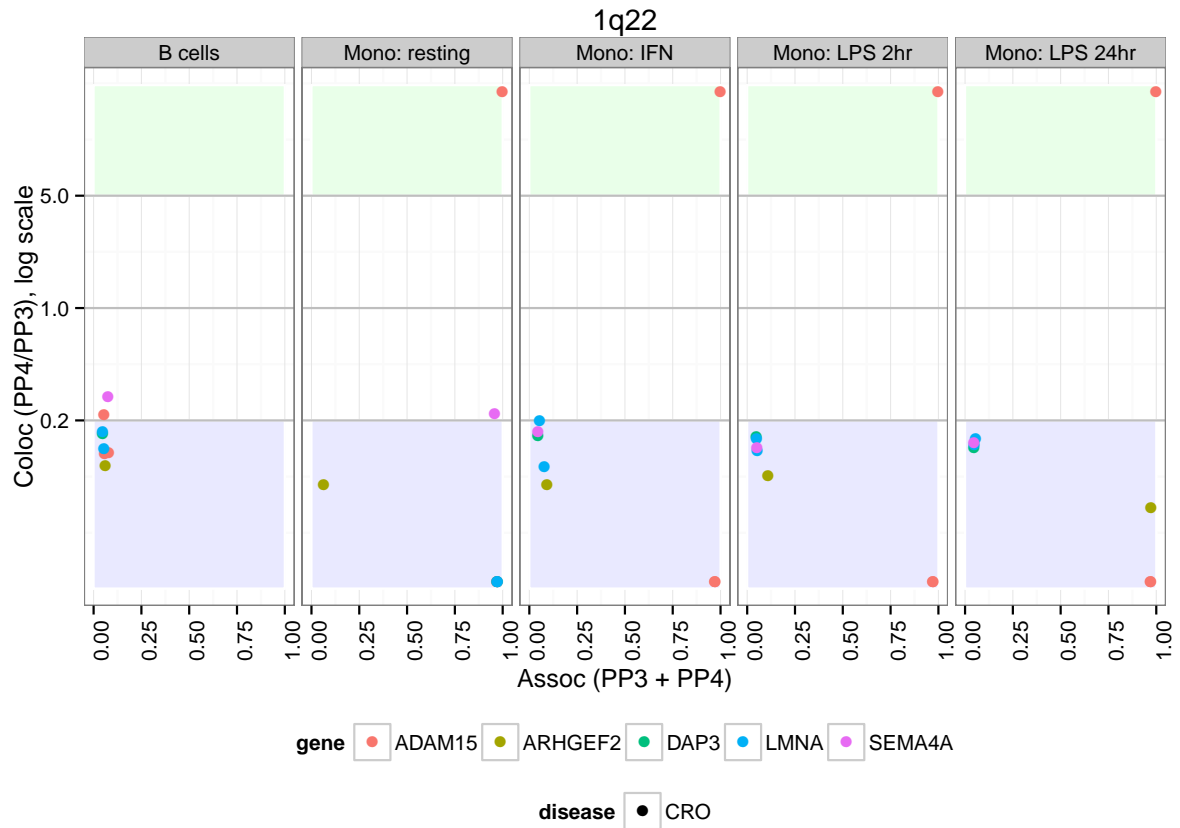

**Supplementary Figure 12.** Evidence for colocalisation across chromosome 1q22 region. This and each plot from Supplementary Figures 13–20 shows the posterior support for association of both gene expression and disease to a region ( $PP_3 + PP_4$ , x axis) and odds for colocalisation ( $PP_4 : PP_3$ , y axis, log scale) across all cell types considered and all genes with evidence of an eQTL in at least one cell type. Colocalising signals are located in the top right of any plot. Where multiple probes exist for a gene, they are shown by the same symbol, allowing us to highlight regions where colocalisation is specific to a single probe (isoform-specific colocalisation). In no case do we find multiple genes colocalising with a disease, or the same gene colocalising across all cells considered. In most cases, the colocalisation is disease-specific. Green (blue) shading is used to indicate regions where the odds  $PP_4:PP_3 > 5 : 1$  ( $< 1 : 5$ ), indicating colocalising (distinct) effects, but note that interpretation also depends on the evidence for association ( $PP_3 + PP_4$ , x axis).

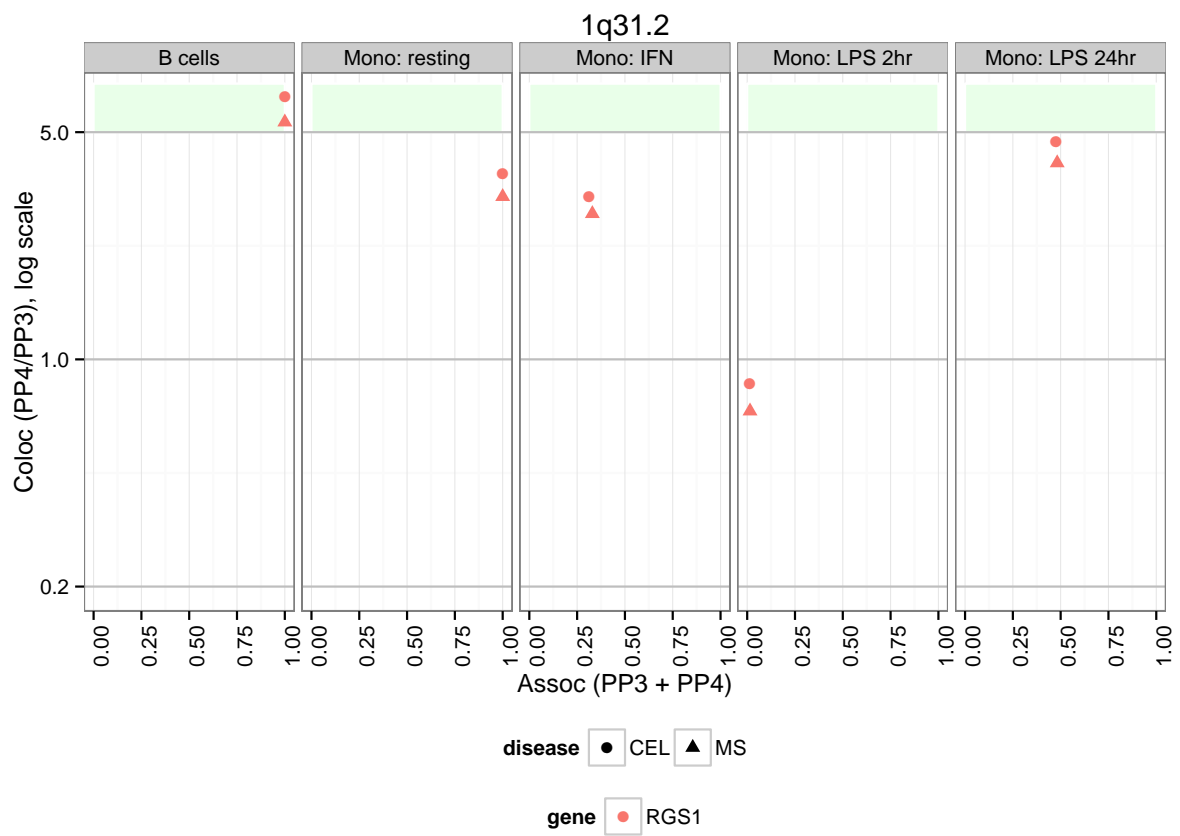

**Supplementary Figure 13.** Evidence for colocalisation across chromosome 1q31.2 region. See Supplementary Figure 12 for details.

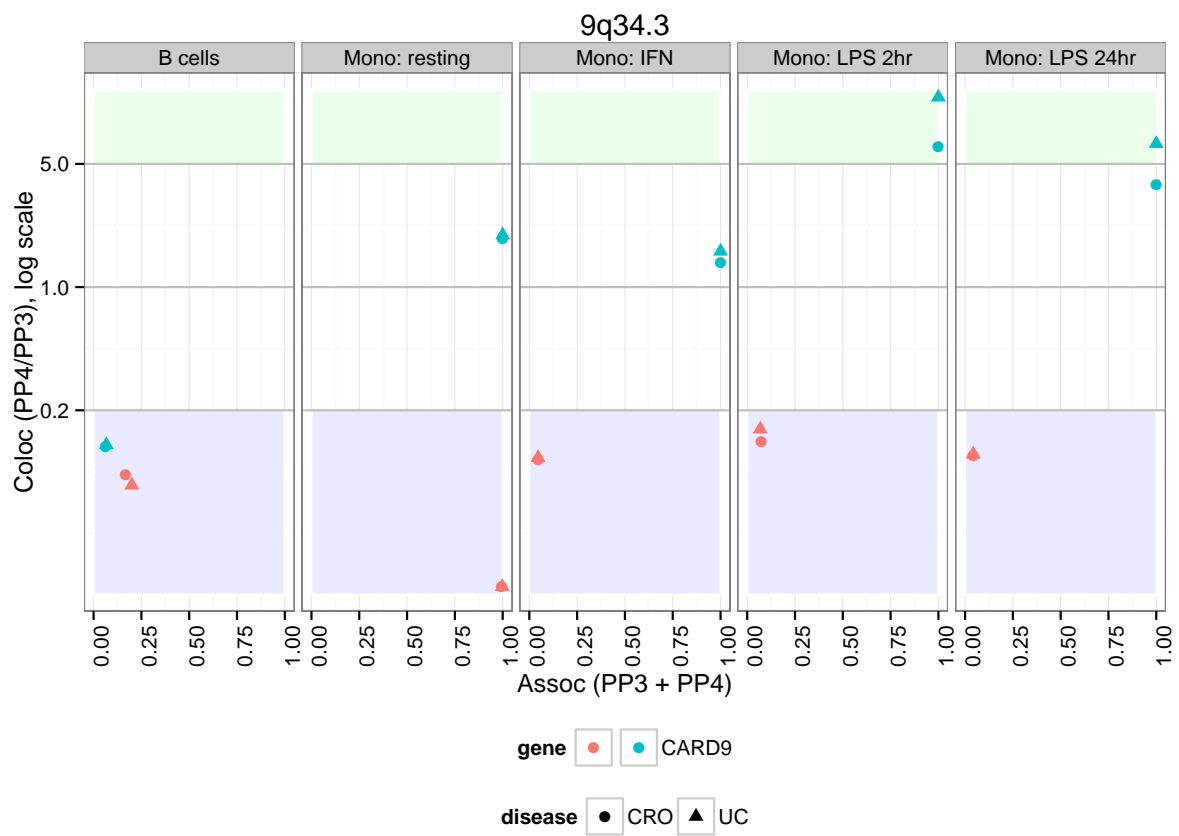

**Supplementary Figure 14.** Evidence for colocalisation across chromosome 9q34.3 region. See Supplementary Figure 12 for details.

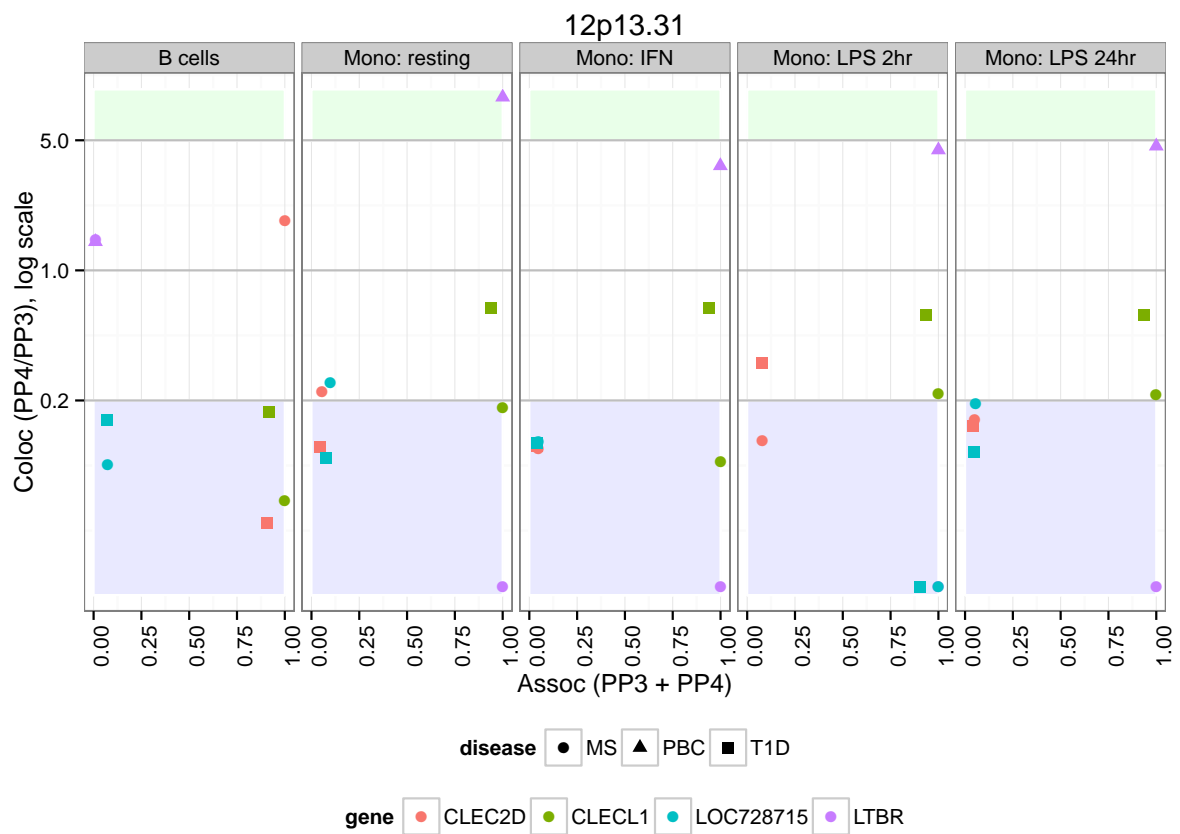

**Supplementary Figure 15.** Evidence for colocalisation across chromosome 12p13.31 region. See Supplementary Figure 12 for details.



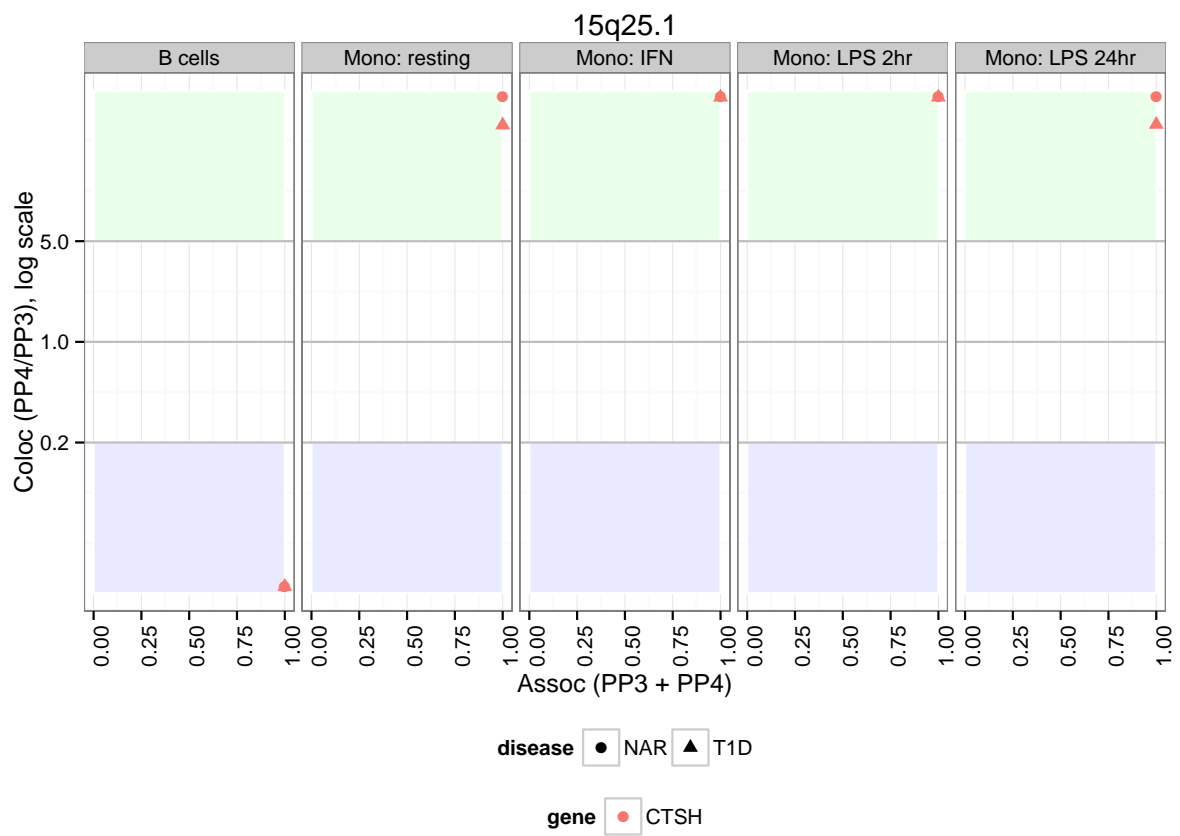

**Supplementary Figure 16.** Evidence for colocalisation across chromosome 15q25.1 region. See Supplementary Figure 12 for details.

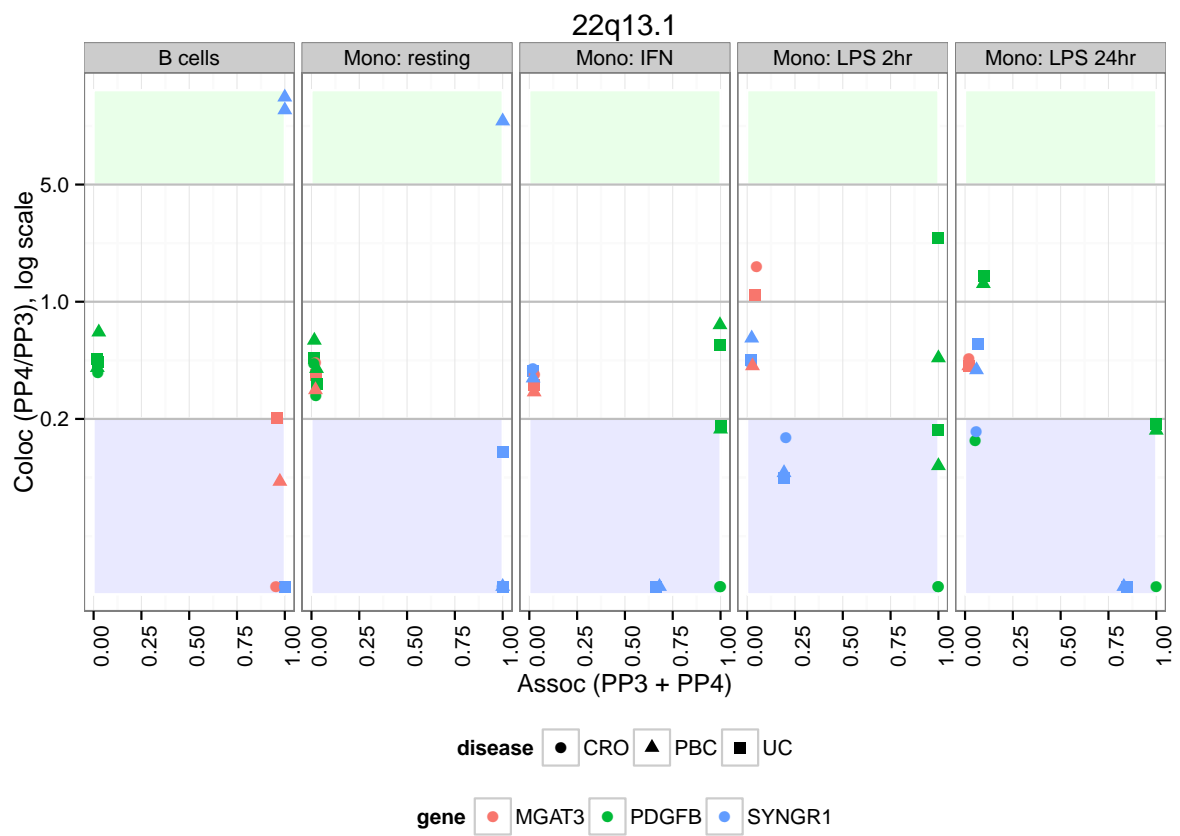

**Supplementary Figure 17.** Evidence for colocalisation across chromosome 22q13.1 region. See Supplementary Figure 12 for details.

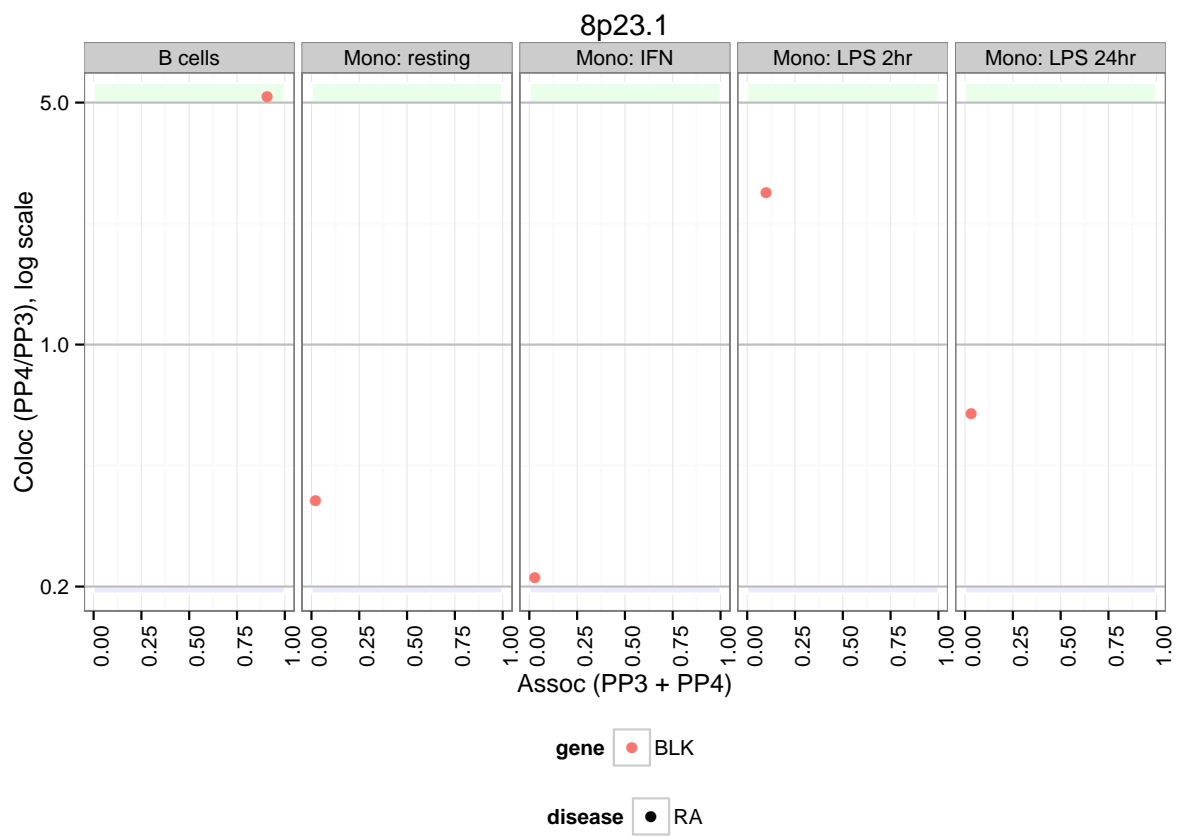

**Supplementary Figure 18.** Evidence for colocalisation across chromosome 8p23.1 region. See Supplementary Figure 12 for details.

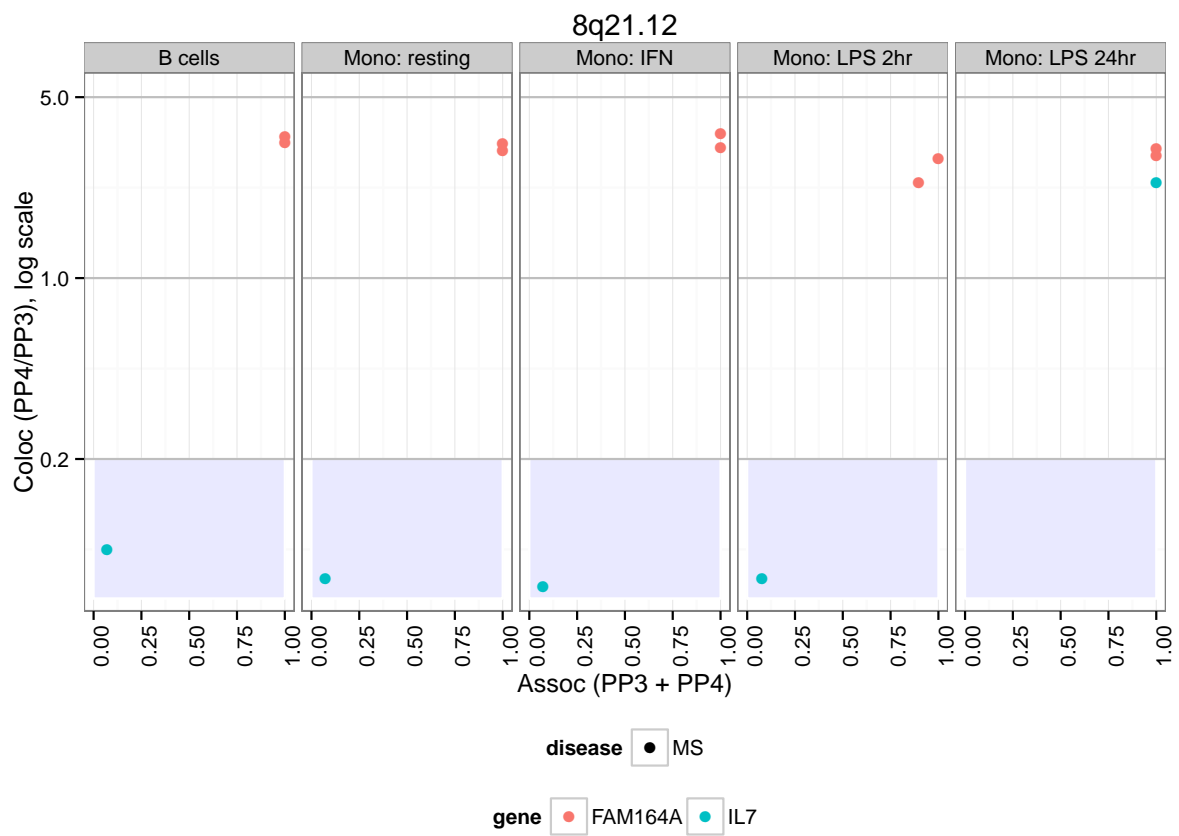

**Supplementary Figure 19.** Evidence for colocalisation across chromosome 8q21.12 region. See Supplementary Figure 12 for details.

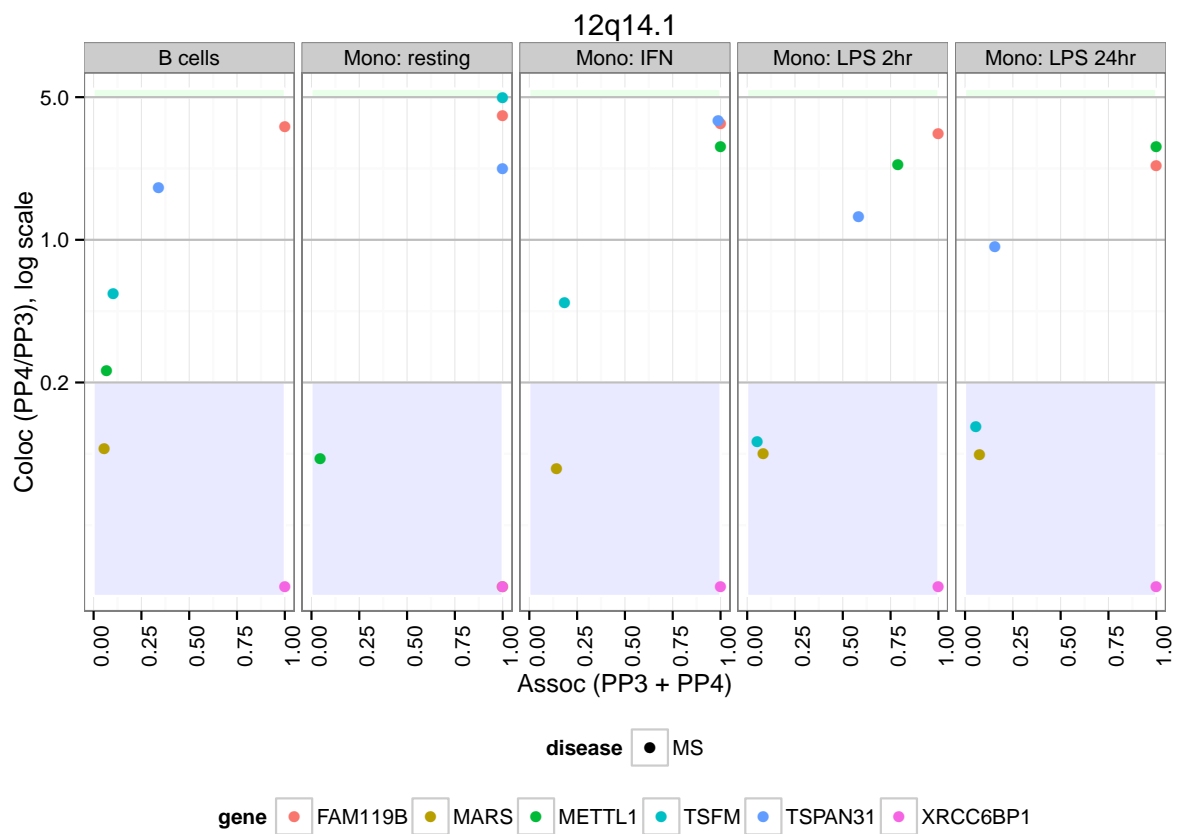

**Supplementary Figure 20.** Evidence for colocalisation across chromosome 12q14.1 region. See Supplementary Figure 12 for details.

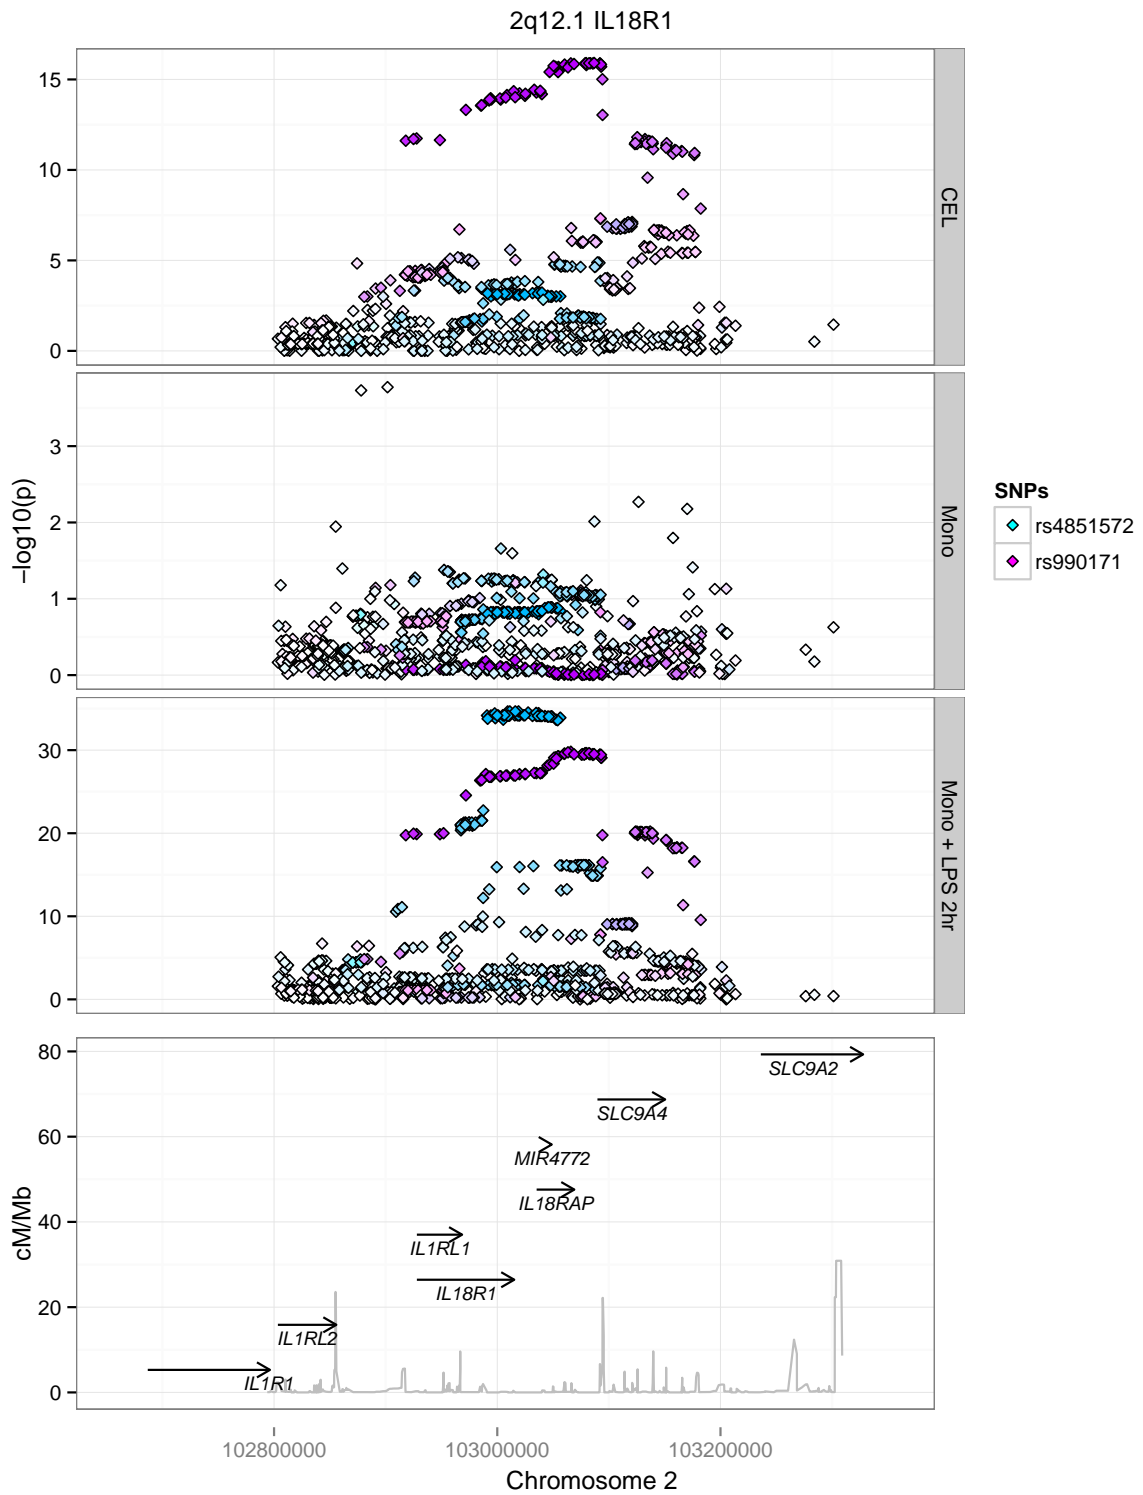

**Supplementary Figure 21.** Chromosome 2q12.1 expression of *IL18R1* (probe ILMN\_1781700)

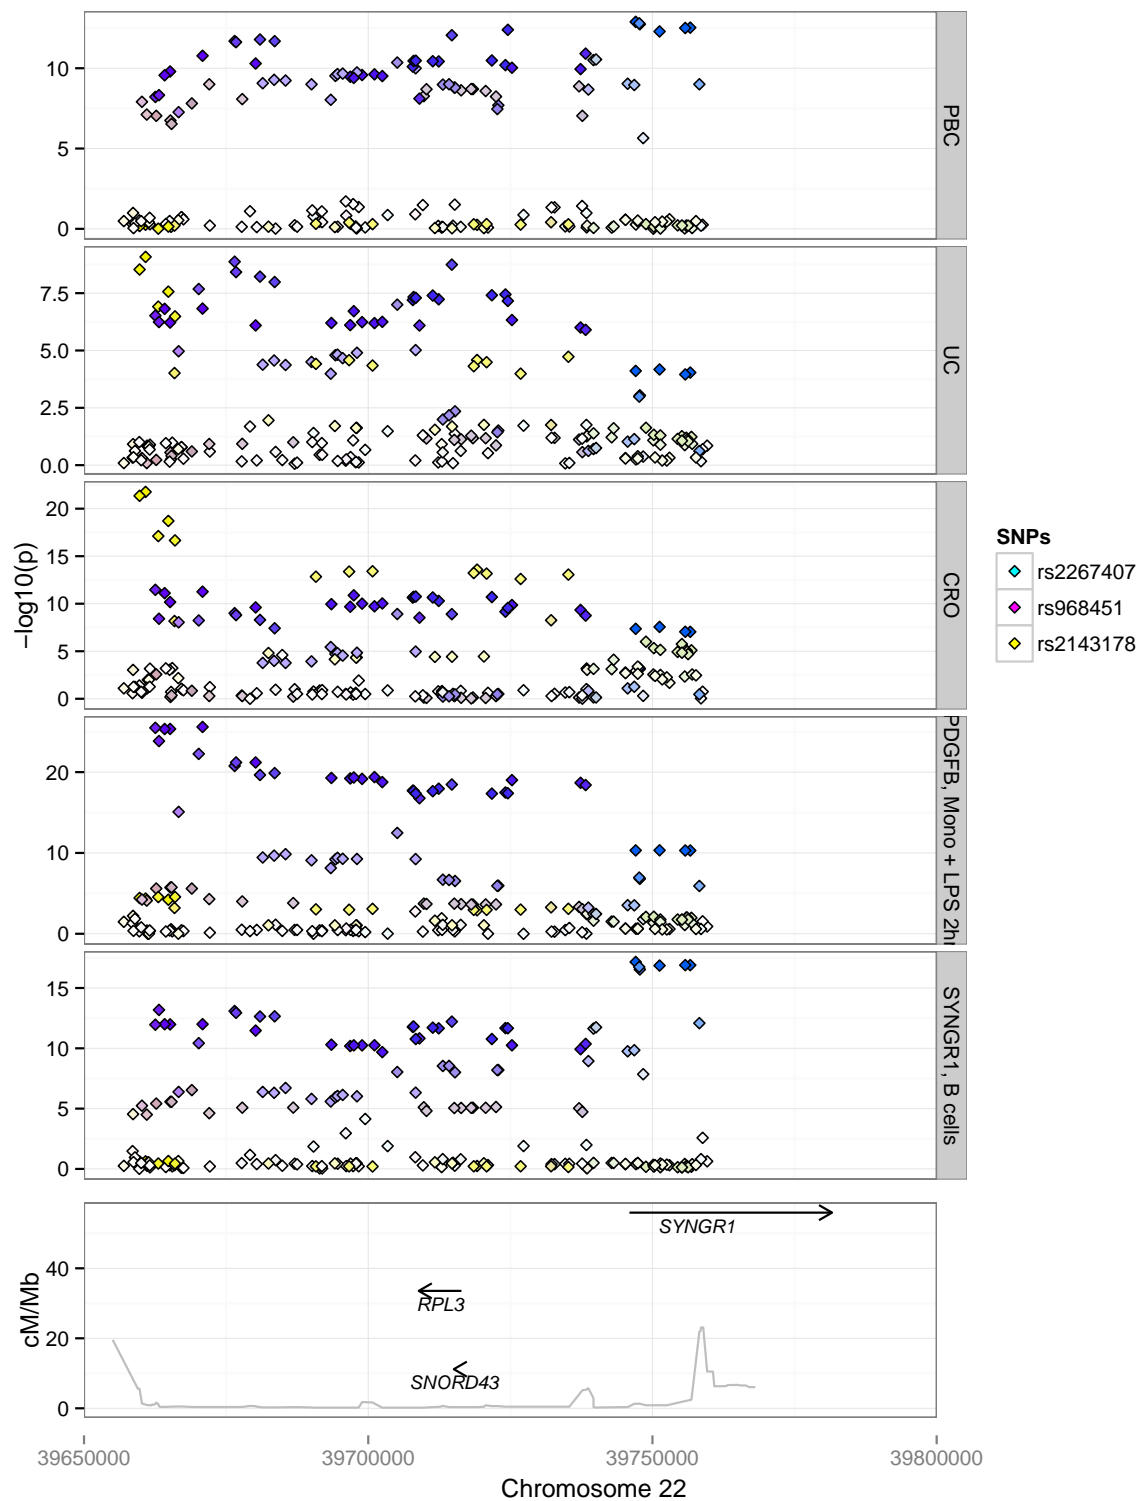

**Supplementary Figure 22.** Chromosome 22q13.1 expression of *PDGFB* (probe ILMN\_1775822) in monocytes stimulated with LPS for 2 hours and *SYNGR1* (probe ILMN\_1810875) in B cells. *PDGFB* is located 160kb outside the region shown, at chr22:39,619,364..39,640,957

**Supplementary Table 1.** Complete results for regions showing evidence for association with both gene expression and disease ( $PP_4 + PP_3 \geq 0.8$ ). - gene expression (unstimulated monocytes and B cells, Interferon- $\gamma$  and Lipopolysaccharide stimulated monocytes) and autoimmune diseases.  $PP_4$  and  $PP_3$  are posterior probabilities of shared causal variant and of distinct causal variants. IFN24 = Monocytes, after 24 hours interferon- $\gamma$  stimulation; LPS2 = Monocytes, after 2 hours lipopolysaccharide stimulation; LPS24 = Monocytes, after 24 hours lipopolysaccharide stimulation.

| Region        | Gene         | Probe        | SNPs | B cells |       | Monocytes |       | IFN24 |       | LPS2  |       | LPS24 |       | Disease |      |
|---------------|--------------|--------------|------|---------|-------|-----------|-------|-------|-------|-------|-------|-------|-------|---------|------|
|               |              |              |      | Assoc   | Coloc | Assoc     | Coloc | Assoc | Coloc | Assoc | Coloc | Assoc | Coloc |         |      |
| 1p36.32       | <i>HES5</i>  | ILMN_1794742 | 289  | 0.02    | 0.28  | 0.04      | 0.17  | 0.85  | 0.01  | 0.02  | 0.34  | 0.02  | 0.27  | ATPD    |      |
|               |              |              | 272  | 0.03    | 0.28  | 0.04      | 0.17  | 0.99  | 0     | 0.03  | 0.43  | 0.02  | 0.25  | CEL     |      |
|               |              |              | 366  | 0.03    | 0.21  | 0.05      | 0.13  | 1     | 0     | 0.04  | 0.28  | 0.03  | 0.19  | MS      |      |
|               |              |              | 249  | 0.02    | 0.29  | 0.04      | 0.24  | 0.96  | 0     | 0.02  | 0.03  | 0.35  | 0.02  | 0.3     | RA   |
|               |              |              | 360  | 0.03    | 0.21  | 0.04      | 0.15  | 0.8   | 0.01  | 0.03  | 0.33  | 0.02  | 0.23  | UC      |      |
|               |              |              | 272  | 0.04    | 0.17  | 1         | 0.05  | 0.98  | 2.34  | 0.57  | 2.86  | 0.04  | 0.46  | 0.46    | ATPD |
| <i>MME1</i>   | ILMN_1718488 | 289          | 0.04 | 0.14    | 0.93  | 1.2       | 0.92  | 1.51  | 0.52  | 1.77  | 0.04  | 0.46  | ATPD  |         |      |
|               |              | 272          | 0.04 | 0.17    | 1     | 0.05      | 0.98  | 2.34  | 0.57  | 2.86  | 0.04  | 0.46  | CEL   |         |      |
|               |              | 366          | 0.05 | 0.12    | 1     | 0.3       | 0.98  | 1.59  | 0.62  | 2.42  | 0.05  | 0.38  | MS    |         |      |
|               |              | 249          | 0.03 | 0.21    | 0.99  | 2.79      | 0.96  | 1.68  | 0.43  | 1     | 0.04  | 0.6   | RA    |         |      |
|               |              | 360          | 0.04 | 0.13    | 0.83  | 0.24      | 0.88  | 1.13  | 0.45  | 1.27  | 0.04  | 0.3   | UC    |         |      |
|               |              | 455          | 0.86 | 0       | 0.86  | 0         | 0.86  | 0     | 0.86  | 0     | 0.86  | 0     | 0.86  | CRO     |      |
| 1p36.23       | <i>UTS2</i>  | ILMN_1671818 | 688  | 1       | 0     | 1         | 0     | 1     | 0     | 1     | 0     | 1     | 0     | UC      |      |
|               |              |              | 455  | 0.86    | 0     | 0.86      | 0     | 0.86  | 0     | 0.86  | 0     | 0.86  | 0     | 0.86    | CRO  |
|               |              |              | 688  | 1       | 0     | 1         | 0     | 1     | 0     | 1     | 0     | 1     | 0     | UC      |      |
|               |              |              | 455  | 0.04    | 0.21  | 0.86      | 0     | 0.74  | 0     | 0.86  | 0     | 0.86  | 0     | 0.86    | CRO  |
|               |              |              | 688  | 0.07    | 0.16  | 1         | 0     | 0.94  | 0     | 1     | 0     | 1     | 0     | 1       | UC   |
|               |              |              | 455  | 0.83    | 0     | 0.86      | 0     | 0.86  | 0     | 0.86  | 0     | 0.86  | 0     | 0.86    | CRO  |
| <i>ERRFI1</i> | ILMN_1665510 | 688          | 0.1  | 0.1     | 0.05  | 0.38      | 1     | 0     | 1     | 0     | 0.99  | 0     | UC    |         |      |
|               |              | 688          | 0.09 | 0.11    | 1     | 0.19      | 1     | 0.17  | 0.86  | 0.08  | 0.71  | 0.2   | UC    |         |      |
|               |              | 359          | 0.03 | 0.2     | 0.83  | 2.31      | 0.75  | 0.99  | 0.68  | 2.26  | 0.68  | 2.06  | CRO   |         |      |
|               |              | 202          | 0.02 | 0.41    | 1     | 0         | 0.05  | 0.89  | 0.03  | 0.5   | 1     | 0     | RA    |         |      |
|               |              | 201          | 0.02 | 0.4     | 1     | 0         | 0.06  | 1.05  | 0.03  | 0.51  | 1     | 0     | RA    |         |      |
|               |              | 1117         | 0.9  | 0       | 1     | 0         | 1     | 0     | 0.65  | 0     | 1     | 0     | MS    |         |      |
| 1p36.13       | <i>PADI4</i> | ILMN_1807529 | 202  | 0.02    | 0.41  | 1         | 0     | 0.05  | 0.89  | 0.03  | 0.5   | 1     | 0     | RA      |      |
|               |              |              | 643  | 0.99    | 0     | 0.2       | 1.34  | 1     | 0     | 1     | 0     | 1     | 0     | RA      |      |
|               |              |              | 671  | 0.99    | 0     | 0.2       | 1.3   | 1     | 0     | 1     | 0     | 1     | 0     | RA      |      |
|               |              |              | 576  | 0.99    | 0     | 0.15      | 0.87  | 1     | 0     | 1     | 0     | 1     | 0     | ATD     |      |
|               |              |              | 677  | 0.99    | 0     | 0.17      | 0.86  | 1     | 0     | 1     | 0     | 1     | 0     | CRO     |      |
|               |              |              | 643  | 0.08    | 0.09  | 1         | 0     | 1     | 0     | 1     | 0     | 1     | 0     | RA      |      |
| 1p22.1        | <i>RPAP2</i> | ILMN_1657754 | 671  | 0.08    | 0.09  | 1         | 0     | 1     | 0     | 1     | 0     | 1     | 0     | T1D     |      |
|               |              |              | 576  | 0.08    | 0.1   | 1         | 0     | 1     | 0     | 1     | 0     | 1     | 0     | ATD     |      |
|               |              |              | 677  | 0.09    | 0.09  | 1         | 0     | 1     | 0     | 1     | 0     | 1     | 0     | CRO     |      |
|               |              |              | 643  | 0.97    | 0.01  | 0.05      | 0.21  | 1     | 0     | 0.06  | 0.14  | 0.06  | 0.19  | CRO     |      |
|               |              |              | 643  | 0.97    | 0.01  | 0.05      | 0.21  | 1     | 0     | 0.06  | 0.14  | 0.06  | 0.19  | RA      |      |
|               |              |              | 671  | 0.97    | 0.01  | 0.06      | 0.2   | 1     | 0     | 0.06  | 0.13  | 0.06  | 0.18  | T1D     |      |
| 1p13.2        | <i>AP4B1</i> | ILMN_1669377 | 643  | 0.99    | 0     | 0.2       | 1.34  | 1     | 0     | 1     | 0     | 1     | 0     | RA      |      |
|               |              |              | 671  | 0.99    | 0     | 0.2       | 1.3   | 1     | 0     | 1     | 0     | 1     | 0     | RA      |      |
|               |              |              | 576  | 0.99    | 0     | 0.15      | 0.87  | 1     | 0     | 1     | 0     | 1     | 0     | ATD     |      |
|               |              |              | 677  | 0.99    | 0     | 0.17      | 0.86  | 1     | 0     | 1     | 0     | 1     | 0     | CRO     |      |
|               |              |              | 643  | 0.08    | 0.09  | 1         | 0     | 1     | 0     | 1     | 0     | 1     | 0     | RA      |      |
|               |              |              | 671  | 0.08    | 0.09  | 1         | 0     | 1     | 0     | 1     | 0     | 1     | 0     | T1D     |      |
| <i>PHTF1</i>  | ILMN_1803464 | 671          | 0.08 | 0.1     | 1     | 0         | 1     | 0     | 1     | 0     | 1     | 0     | ATD   |         |      |
|               |              | 576          | 0.08 | 0.1     | 1     | 0         | 1     | 0     | 1     | 0     | 1     | 0     | ATD   |         |      |
|               |              | 677          | 0.09 | 0.09    | 1     | 0         | 1     | 0     | 1     | 0     | 1     | 0     | CRO   |         |      |
|               |              | 643          | 0.97 | 0.01    | 0.05  | 0.21      | 1     | 0     | 0.06  | 0.14  | 0.06  | 0.19  | CRO   |         |      |
|               |              | 643          | 0.97 | 0.01    | 0.05  | 0.21      | 1     | 0     | 0.06  | 0.14  | 0.06  | 0.19  | RA    |         |      |
|               |              | 671          | 0.97 | 0.01    | 0.06  | 0.2       | 1     | 0     | 0.06  | 0.13  | 0.06  | 0.18  | T1D   |         |      |
| <i>PTPN22</i> | ILMN_1695640 | 643          | 0.97 | 0.01    | 0.05  | 0.21      | 1     | 0     | 0.06  | 0.14  | 0.06  | 0.19  | RA    |         |      |
|               |              | 671          | 0.97 | 0.01    | 0.06  | 0.2       | 1     | 0     | 0.06  | 0.13  | 0.06  | 0.18  | T1D   |         |      |

Continued on next page



| Supplementary Table 1 – continued from previous page | Region | Gene           | Probe        | SNPs  |       | B cells |       | Monocytes |       | IFN24 |       | LPS2  |       | LPS24 |      | Disease |
|------------------------------------------------------|--------|----------------|--------------|-------|-------|---------|-------|-----------|-------|-------|-------|-------|-------|-------|------|---------|
|                                                      |        |                |              | Assoc | Coloc | Assoc   | Coloc | Assoc     | Coloc | Assoc | Coloc | Assoc | Coloc |       |      |         |
|                                                      |        |                |              | 576   | 0.97  | 0       | 0.05  | 0.23      | 1     | 0     | 0.05  | 0.16  | 0.05  | 0.24  | AT1D |         |
|                                                      |        |                |              | 677   | 0.97  | 0       | 0.06  | 0.2       | 1     | 0     | 0.06  | 0.13  | 0.06  | 0.16  | CRO  |         |
|                                                      |        |                | ILMN_1715885 | 643   | 1     | 0       | 0.52  | 0.22      | 1     | 0     | 0.06  | 0.13  | 0.06  | 0.23  | RA   |         |
|                                                      |        |                |              | 671   | 1     | 0       | 0.54  | 0.23      | 1     | 0     | 0.07  | 0.13  | 0.06  | 0.22  | T1D  |         |
|                                                      |        |                |              | 576   | 1     | 0       | 0.52  | 0.18      | 1     | 0     | 0.06  | 0.16  | 0.05  | 0.25  | AT1D |         |
|                                                      |        |                |              | 677   | 1     | 0       | 0.51  | 0.21      | 1     | 0     | 0.07  | 0.12  | 0.06  | 0.17  | CRO  |         |
|                                                      |        |                | ILMN_2246328 | 643   | 1     | 0       | 1     | 0         | 1     | 0     | 0.53  | 0.02  | 0.53  | 0.02  | RA   |         |
|                                                      |        |                |              | 671   | 1     | 0       | 1     | 0         | 1     | 0     | 0.53  | 0.02  | 0.53  | 0.02  | T1D  |         |
|                                                      |        |                |              | 576   | 1     | 0       | 1     | 0         | 1     | 0     | 0.53  | 0.03  | 0.54  | 0.02  | AT1D |         |
|                                                      |        |                |              | 677   | 1     | 0       | 1     | 0         | 1     | 0     | 0.54  | 0.02  | 0.53  | 0.01  | CRO  |         |
| 1q22                                                 |        | <i>ADAM15</i>  | ILMN_1751500 | 523   | 0.05  | 0.22    | 1     | 22.16     | 1     | 22.06 | 1     | 22.16 | 1     | 22.16 | CRO  |         |
|                                                      |        |                | ILMN_1756920 | 523   | 0.06  | 0.12    | 0.97  | 0         | 0.97  | 0     | 0.97  | 0     | 0.97  | 0     | CRO  |         |
|                                                      |        |                | ILMN_2384544 | 523   | 0.08  | 0.13    | 0.97  | 0         | 0.97  | 0     | 0.97  | 0     | 0.97  | 0     | CRO  |         |
|                                                      |        | <i>ARHGEF2</i> | ILMN_1703477 | 523   | 0.06  | 0.1     | 0.06  | 0.08      | 0.09  | 0.08  | 0.11  | 0.09  | 0.97  | 0.06  | CRO  |         |
| 1q23.3                                               |        | <i>FCGR2B</i>  | ILMN_1660027 | 218   | 0.06  | 0.1     | 1     | 0         | 1     | 0     | 0.03  | 0.24  | 0.93  | 0     | UC   |         |
|                                                      |        |                |              | 159   | 0.05  | 0.22    | 0.99  | 0         | 1     | 0     | 0.02  | 0.36  | 0.46  | 0.01  | CRO  |         |
|                                                      |        |                | ILMN_2382403 | 218   | 0.04  | 0.38    | 1     | 0         | 1     | 0     | 0.04  | 0.23  | 0.91  | 0     | UC   |         |
|                                                      |        | <i>FCRLB</i>   | ILMN_1782015 | 159   | 0.03  | 0.36    | 1     | 0         | 1     | 0     | 0.03  | 0.31  | 0.45  | 0.01  | CRO  |         |
|                                                      |        | <i>HSPA6</i>   | ILMN_1806165 | 218   | 0.1   | 0.7     | 1     | 0         | 1     | 0     | 0.04  | 0.37  | 0.48  | 0.02  | UC   |         |
|                                                      |        |                |              | 159   | 1     | 0       | 1     | 0         | 1     | 0     | 0.13  | 0.09  | 0.02  | 0.34  | UC   |         |
|                                                      |        | <i>SDHC</i>    | ILMN_2323366 | 218   | 0.04  | 0.21    | 0.78  | 0         | 0.97  | 0     | 0.03  | 0.21  | 0.09  | 0.26  | UC   |         |
| 1q31.2                                               |        | <i>RGS1</i>    | ILMN_1656011 | 83    | 1     | 6.41    | 1     | 3.74      | 0.31  | 3.17  | 0.01  | 0.84  | 0.48  | 4.67  | CEL  |         |
|                                                      |        |                |              | 101   | 1     | 5.37    | 1     | 3.17      | 0.33  | 2.81  | 0.01  | 0.69  | 0.48  | 4.02  | MS   |         |
| 1q31.3                                               |        | <i>C1orf53</i> | ILMN_1661595 | 597   | 0.05  | 0.12    | 1     | 0         | 1     | 0     | 0.07  | 0.11  | 0.8   | 0     | CRO  |         |
|                                                      |        |                |              | 580   | 0.05  | 0.12    | 1     | 0         | 1     | 0     | 0.07  | 0.11  | 0.53  | 0.01  | PBC  |         |
|                                                      |        |                |              | 593   | 0.05  | 0.12    | 0.94  | 0         | 0.94  | 0     | 0.08  | 0.09  | 0.8   | 0     | UC   |         |
| 1q32.1                                               |        | <i>IL19</i>    | ILMN_1682592 | 363   | 0.04  | 0.29    | 0.06  | 0.11      | 1     | 0     | 1     | 0     | 0.21  | 0.03  | UC   |         |
|                                                      |        |                |              | 240   | 0.03  | 0.58    | 0.03  | 0.24      | 1     | 0     | 1     | 0     | 0.19  | 0.04  | CRO  |         |
|                                                      |        |                |              | 236   | 0.03  | 0.52    | 0.02  | 0.28      | 1     | 0     | 1     | 0     | 0.2   | 0.05  | T1D  |         |
|                                                      |        |                | ILMN_1799575 | 363   | 0.09  | 0.09    | 0.03  | 0.28      | 1     | 0     | 0.99  | 0     | 0.13  | 0.06  | UC   |         |
|                                                      |        |                |              | 240   | 0.04  | 0.28    | 0.02  | 0.41      | 1     | 0     | 0.99  | 0     | 0.12  | 0.06  | CRO  |         |
|                                                      |        | <i>IL24</i>    | ILMN_1774685 | 236   | 0.04  | 0.3     | 0.02  | 0.38      | 1     | 0     | 0.98  | 0     | 0.14  | 0.08  | T1D  |         |
|                                                      |        |                |              | 363   | 0.06  | 0.14    | 0.03  | 0.23      | 1     | 0     | 0.04  | 0.23  | 0.11  | 0.06  | UC   |         |
|                                                      |        |                |              | 240   | 0.05  | 0.17    | 0.02  | 0.37      | 1     | 0     | 0.03  | 0.34  | 0.16  | 0.04  | CRO  |         |
|                                                      |        |                |              | 236   | 0.06  | 0.17    | 0.02  | 0.37      | 1     | 0     | 0.03  | 0.33  | 0.17  | 0.18  | T1D  |         |
|                                                      |        |                | ILMN_2407799 | 363   | 0.04  | 0.26    | 0.05  | 0.25      | 1     | 0     | 0.07  | 0.12  | 0.08  | 0.1   | UC   |         |
|                                                      |        |                |              | 240   | 0.03  | 0.37    | 0.03  | 0.36      | 1     | 0     | 0.04  | 0.22  | 0.1   | 0.07  | CRO  |         |
|                                                      |        |                |              | 236   | 0.03  | 0.36    | 0.03  | 0.47      | 1     | 0     | 0.04  | 0.25  | 0.11  | 0.24  | T1D  |         |
| 2p21                                                 |        | <i>THADA</i>   | ILMN_1811624 | 847   | 0.08  | 0.1     | 0.77  | 0         | 0.09  | 0.2   | 0.16  | 0.06  | 0.98  | 0.22  | CRO  |         |
| 2p16.1                                               |        | <i>AHSA2</i>   | ILMN_1798308 | 970   | 1     | 0       | 1     | 0         | 0.32  | 0.02  | 0.11  | 0.05  | 0.08  | 0.06  | MS   |         |
|                                                      |        |                |              | 899   | 1     | 0       | 1     | 0         | 0.29  | 0.03  | 0.11  | 0.11  | 0.08  | 0.08  | PS   |         |

Continued on next page

| Supplementary Region | Gene   | Probe        | SNPs         |               |       | Monocytes |       | IFN24 |       | LPS2  |       | LPS24 |      | Disease |      |
|----------------------|--------|--------------|--------------|---------------|-------|-----------|-------|-------|-------|-------|-------|-------|------|---------|------|
|                      |        |              | Assoc        | Coloc         | Assoc | Coloc     | Assoc | Coloc | Assoc | Coloc | Assoc | Coloc |      |         |      |
| 2p14                 | SPRED2 | ILMN_1791232 | 796          | 1             | 0     | 1         | 0     | 0.27  | 0.04  | 0.09  | 0.07  | 0.07  | 0.07 | CHEL    |      |
|                      |        | PLEK         | ILMN_1795762 | 984           | 1     | 0         | 1     | 0     | 0.33  | 0.03  | 0.11  | 0.06  | 0.08 | 0.06    | UC   |
|                      |        | PPP3R1       | ILMN_1796962 | 980           | 1     | 0         | 1     | 0     | 0.33  | 0.03  | 0.11  | 0.07  | 0.08 | 0.06    | CRO  |
|                      |        | IL18R1       | ILMN_1781700 | 970           | 1     | 0         | 1     | 0     | 1     | 0     | 1     | 0     | 1    | 0       | MS   |
|                      |        | IL18RAP      | ILMN_1721762 | 830           | 0.68  | 0.01      | 0.05  | 0.05  | 0.41  | 0.01  | 1     | 0     | 1    | 0       | PS   |
|                      |        | UBBE2E3      | ILMN_2390338 | 978           | 0.13  | 0.06      | 0.39  | 0.05  | 0.18  | 0.05  | 1     | 0     | 0.13 | 0.07    | CRO  |
|                      |        | SP110        | ILMN_1813455 | 830           | 0.11  | 0.05      | 0.56  | 1.76  | 0.15  | 0.03  | 1     | 0     | 0.08 | 0.07    | CHEL |
|                      |        | SP140        | ILMN_2246882 | 746           | 0.99  | 0         | 1     | 0     | 0.87  | 0.03  | 1     | 0     | 1    | 0       | CHEL |
|                      |        | ATG16L1      | ILMN_1725707 | 293           | 0.91  | 0         | 1     | 0     | 0.66  | 0     | 0.03  | 0.27  | 0.03 | 0.2     | CRO  |
|                      |        | 2q31.3       | ABHD6        | ILMN_17706344 | 279   | 0.95      | 0     | 1     | 0     | 0.35  | 0.01  | 0.03  | 0.27 | 0.04    | 0.19 |
| 2q37.1               | PRKAA1 | ILMN_2365881 | 293          | 1             | 0     | 0.66      | 0.01  | 0.11  | 0.05  | 0.03  | 0.25  | 0.03  | 0.26 | CRO     |      |
|                      |        | ILMN_1710221 | 293          | 1             | 0     | 0.63      | 0.05  | 0.11  | 0.05  | 0.03  | 0.24  | 0.03  | 0.26 | MS      |      |
|                      |        | ILMN_1706344 | 520          | 1             | 0     | 0.15      | 0.04  | 0.99  | 0.03  | 0.15  | 0.16  | 1     | 0    | CRO     |      |
|                      |        | ILMN_2049184 | 186          | 0.03          | 0.71  | 1         | 0     | 1     | 0.15  | 0.06  | 0.65  | 0.03  | 0.59 | UC      |      |
|                      |        | ILMN_1739274 | 704          | 0.33          | 0.02  | 0.9       | 0     | 0.91  | 0     | 0.91  | 0     | 0.91  | 0    | RA      |      |
|                      |        | ILMN_1739274 | 704          | 0.06          | 0.15  | 0.91      | 0     | 0.91  | 0     | 0.7   | 0     | 0.91  | 0    | RA      |      |
|                      |        | ILMN_1815063 | 704          | 0.36          | 0.02  | 0.91      | 0     | 0.91  | 0     | 0.09  | 0.08  | 0.16  | 0.04 | RA      |      |
|                      |        | ILMN_1811104 | 373          | 0.55          | 0.01  | 1         | 0     | 1     | 0     | 0.59  | 0.02  | 1     | 0    | MS      |      |
|                      |        | ILMN_2342579 | 309          | 0.51          | 0.01  | 1         | 0     | 1     | 0     | 0.55  | 0     | 1     | 0    | CHEL    |      |
|                      |        | ILMN_2342579 | 375          | 0.55          | 0.01  | 1         | 0     | 1     | 0     | 0.6   | 0.01  | 1     | 0    | PBC     |      |
| 5p13.2               | PRKAA1 | ILMN_2342579 | 428          | 0.05          | 0.14  | 0.03      | 0.12  | 0.93  | 1.12  | 0.42  | 0.69  | 1     | 0    | MS      |      |
|                      |        | ILMN_2357577 | 424          | 0.05          | 0.14  | 0.03      | 0.12  | 0.94  | 0.48  | 0.45  | 0.63  | 1     | 0    | PBC     |      |
|                      |        | ILMN_1717234 | 761          | 0.08          | 0.07  | 0.05      | 0.09  | 0.09  | 0.05  | 1     | 0     | 0.31  | 0.02 | CRO     |      |
|                      |        | ILMN_1783627 | 692          | 0.07          | 0.09  | 0.04      | 0.09  | 0.09  | 0.05  | 1     | 0     | 0.09  | 0.12 | MS      |      |
|                      |        | ILMN_1772334 | 699          | 0.06          | 0.13  | 0.04      | 0.11  | 0.09  | 0.16  | 0.92  | 0     | 0.08  | 0.12 | UC      |      |
|                      |        | ILMN_1783627 | 950          | 1             | 0     | 1         | 0     | 1     | 0     | 0.98  | 0     | 1     | 0    | PS      |      |
|                      |        | ILMN_1743145 | 862          | 0.34          | 0.07  | 0.88      | 0     | 0.88  | 0     | 0.14  | 0.19  | 0.88  | 0    | CRO     |      |
|                      |        | ILMN_1743145 | 950          | 0.13          | 0.04  | 1         | 0     | 1     | 0     | 0.95  | 0     | 1     | 0    | PS      |      |
|                      |        | ILMN_1743145 | 862          | 0.11          | 0.1   | 0.88      | 0     | 0.88  | 0     | 0.81  | 0     | 0.86  | 0    | CRO     |      |
|                      |        | ILMN_1814737 | 950          | 1             | 0     | 1         | 0     | 1     | 0     | 1     | 0     | 1     | 0    | PS      |      |
| 5p15                 | LNPBP  | ILMN_1814737 | 862          | 0.9           | 0.19  | 0.9       | 0.23  | 0.9   | 0.23  | 0.9   | 0.23  | 0.9   | 0.23 | CRO     |      |
|                      |        | ILMN_1814737 | 950          | 0.59          | 0.03  | 1         | 0     | 0.99  | 0     | 0.5   | 0.01  | 1     | 0    | PS      |      |

Continued on next page

Supplementary Table 1 – continued from previous page

| Region  | Gene            | Probe        | SNPs | Coloc       |             | Monocytes |             | IFN24    |             | LPS2     |       | LPS24    |             | Disease |
|---------|-----------------|--------------|------|-------------|-------------|-----------|-------------|----------|-------------|----------|-------|----------|-------------|---------|
|         |                 |              |      | Assoc       | Coloc       | Assoc     | Coloc       | Assoc    | Coloc       | Assoc    | Coloc | Assoc    | Coloc       |         |
| 5q21.1  | <i>PAM</i>      | ILMN_2313901 | 862  | 0.63        | 0.7         | 0.91      | 0.35        | 0.89     | 0.25        | 0.5      | 0.24  | 0.91     | 0.33        | CRO     |
| 5q31.1  | <i>CSF2</i>     | ILMN_1661861 | 788  | 0.96        | 0           | 0.99      | 0           | 0.46     | 0.01        | 0.99     | 0     | 0.14     | 0.06        | RA      |
|         |                 |              | 743  | 0.08        | 0.12        | 0.07      | 0.26        | 0.98     | 0           | 0.09     | 0.14  | 0.08     | 0.19        | UC      |
|         | <i>P4HA2</i>    | ILMN_1795778 | 822  | 0.08        | 0.12        | 0.07      | 0.2         | 0.98     | 0           | 0.09     | 0.1   | 0.08     | 0.11        | PS      |
|         |                 |              | 743  | 0.07        | 0.13        | 0.06      | 0.14        | 0.98     | 0           | 0.98     | 0     | 0.98     | 0.03        | UC      |
|         |                 |              | 822  | 0.08        | 0.12        | 0.08      | 0.19        | 0.98     | 0           | 0.98     | 0     | 0.98     | 0           | PS      |
|         |                 | ILMN_2381697 | 743  | 0.09        | 0.12        | 0.06      | 0.19        | 0.98     | 0           | 0.98     | 0     | 0.98     | 0.02        | UC      |
|         |                 |              | 822  | 0.1         | 0.11        | 0.06      | 0.15        | 0.98     | 0           | 0.98     | 0     | 0.98     | 0           | PS      |
|         | <i>SLC22A4</i>  | ILMN_1685057 | 743  | 0.1         | 0.14        | 0.99      | 0.35        | 0.97     | 0.04        | 0.09     | 0.11  | 0.08     | 0.12        | UC      |
|         |                 |              | 822  | 0.1         | 0.12        | 0.98      | 0           | 0.97     | 0           | 0.1      | 0.2   | 0.09     | 0.14        | PS      |
|         | <i>SLC22A5</i>  | ILMN_1699357 | 743  | 0.98        | 0.01        | 0.98      | 0           | 0.98     | 0           | 0.95     | 0.01  | 0.89     | 0           | UC      |
|         |                 |              | 822  | 0.98        | 0           | 0.98      | 0           | 0.98     | 0           | 0.96     | 0     | 0.89     | 0           | PS      |
| 5q35.2  | <i>CPEB4</i>    | ILMN_1722025 | 611  | 0.96        | 1.32        | 0.97      | 2.19        | 0.97     | 2.09        | 0.97     | 2.02  | 0.97     | 2.17        | CRO     |
|         |                 |              | 614  | 0.96        | 1.25        | 0.97      | 2.18        | 0.97     | 2.06        | 0.97     | 2.06  | 0.97     | 2.43        | CRO     |
| 6q21    | <i>TRAF3IP2</i> | ILMN_1701514 | 638  | 1           | 0           | 1         | 0           | 0.07     | 0.09        | 0.08     | 0.1   | 0.07     | 0.13        | PS      |
|         |                 |              | 695  | 0.98        | 0           | 0.98      | 0           | 0.08     | 0.1         | 0.09     | 0.1   | 0.08     | 0.14        | UC      |
| 6q25.3  | <i>RSPH3</i>    | ILMN_1788223 | 441  | 0.11        | 0.07        | 1         | 0           | 0.99     | 0           | 0.97     | 0     | 1        | 0           | CEL     |
|         |                 |              | 515  | 0.12        | 0.08        | 1         | 0           | 0.99     | 0           | 0.97     | 0     | 1        | 0           | CRO     |
|         |                 |              | 513  | 0.12        | 0.04        | 1         | 0           | 0.99     | 0           | 0.98     | 0     | 1        | 0           | MS      |
| 6q27    | <i>RNASET2</i>  | ILMN_1671565 | 314  | 0.86        | 1.45        | 1         | 1.57        | 0.08     | 0.59        | 1        | 1.45  | 1        | 1.62        | ATD     |
|         |                 |              | 487  | 0.69        | 0.01        | 1         | 0           | 0.09     | 0.28        | 1        | 0.01  | 1        | 0           | CRO     |
|         | <i>RPS6KA2</i>  | ILMN_1716218 | 314  | 0.06        | 0.09        | 1         | 0           | 0.96     | 0           | 0.99     | 0     | 1        | 0           | ATD     |
|         |                 |              | 487  | 0.07        | 0.11        | 1         | 0           | 0.98     | 0           | 1        | 0     | 1        | 0           | CRO     |
| 7p15.2  | <i>SKAP2</i>    | ILMN_1657129 | 720  | 0.95        | 0.75        | 0.05      | 0.13        | 0.09     | 0.06        | 0.05     | 0.1   | 0.08     | 0.12        | CRO     |
|         |                 |              | 701  | 0.89        | 0.72        | 0.05      | 0.12        | 0.08     | 0.06        | 0.05     | 0.1   | 0.08     | 0.13        | THD     |
|         |                 |              | 734  | 1           | 0           | 0.06      | 0.1         | 0.17     | 1.3         | 0.07     | 0.27  | 0.09     | 0.09        | MS      |
| 7p12.2  | <i>FIGNL1</i>   | ILMN_1778152 | 666  | 1           | 0.46        | 1         | 0.2         | 0.06     | 0.19        | 0.12     | 0.54  | 0.1      | 0.21        | THD     |
|         |                 |              | 666  | 1           | 0.28        | 1         | 0.68        | 0.07     | 0.35        | 0.06     | 0.15  | 0.1      | 0.3         | THD     |
|         |                 | ILMN_2389114 | 314  | 0.89        | 0.02        | 0.89      | 0.02        | 0.89     | 0.02        | 0.89     | 0.02  | 0.89     | 0.02        | RA      |
| 7q32.1  | <i>IRF5</i>     | ILMN_1670576 | 327  | 0.99        | 0.04        | 0.99      | 0.05        | 0.99     | 0.05        | 0.99     | 0.05  | 0.99     | 0.12        | UC      |
|         |                 |              | 328  | 1           | 0           | 1         | 0           | 1        | 0           | 1        | 0     | 1        | 0           | PBC     |
|         |                 |              | 315  | 0.89        | 0.02        | 0.89      | 0.02        | 0.89     | 0.02        | 0.89     | 0.02  | 0.89     | 0.02        | RA      |
|         | <i>TNPO3</i>    | ILMN_1683811 | 314  | 0.88        | 0           | 0.89      | 0           | 0.89     | 0           | 0.89     | 0     | 0.89     | 0           | RA      |
|         |                 |              | 327  | 0.98        | 0.19        | 0.99      | 0.26        | 0.99     | 0.29        | 0.99     | 0.23  | 0.99     | 0.23        | UC      |
|         |                 |              | 328  | 0.99        | 0           | 1         | 0           | 1        | 0           | 1        | 0     | 1        | 0           | PBC     |
|         |                 |              | 315  | 0.88        | 0.01        | 0.89      | 0           | 0.89     | 0           | 0.89     | 0     | 0.89     | 0           | RA      |
| 8p23.1  | <i>BLK</i>      | ILMN_1668277 | 349  | <b>0.91</b> | <b>5.18</b> | 0.02      | 0.36        | 0.03     | 0.21        | 0.1      | 2.75  | 0.03     | 0.63        | RA      |
|         | <i>C8orf13</i>  | ILMN_1687213 | 349  | 0.83        | 1.95        | 0.63      | 0           | 0.19     | 3.76        | 0.77     | 2.41  | 0.16     | 0.03        | RA      |
| 8q21.12 | <i>FAM164A</i>  | ILMN_1789558 | 892  | <b>1</b>    | <b>3.52</b> | <b>1</b>  | <b>3.12</b> | <b>1</b> | <b>3.61</b> | <b>1</b> | 2.89  | <b>1</b> | <b>3.17</b> | MS      |
|         |                 | ILMN_2057981 | 892  | <b>1</b>    | <b>3.35</b> | <b>1</b>  | <b>3.31</b> | <b>1</b> | <b>3.2</b>  | 0.9      | 2.34  | <b>1</b> | 2.98        | MS      |
| 9p13.3  | <i>GALT</i>     | ILMN_1657475 | 393  | 0.24        | 0.04        | 0.99      | 0           | 0.81     | 0           | 0.12     | 0.09  | 0.09     | 0.14        | RA      |
|         | <i>IL11RA</i>   | ILMN_1664912 | 393  | 0.12        | 0.04        | 0.99      | 0           | 0.34     | 0.01        | 0.05     | 0.14  | 0.06     | 0.38        | RA      |

Continued on next page

Supplementary Table 1 – continued from previous page

| Supplementary Region | Gene             | Probe        | SNPs | AssoC |             | Monocytes |              | IFN24       |               | LPS2  |               | LPS24 |              | Disease |
|----------------------|------------------|--------------|------|-------|-------------|-----------|--------------|-------------|---------------|-------|---------------|-------|--------------|---------|
|                      |                  |              |      | Coloc | AssoC       | Coloc     | AssoC        | Coloc       | AssoC         | Coloc | AssoC         | Coloc | AssoC        |         |
| 9q34.3               | <i>SIGMAR1</i>   | ILMN_2398489 | 393  | 0.81  | 0           | 0.99      | 0            | 0.3         | 0.01          | 0.04  | 0.14          | 0.16  | 0.2          | RA      |
|                      | <i>CARD9</i>     | ILMN_1712532 | 507  | 0.06  | 0.12        | 1         | 1.89         | 1           | 1.37          | 1     | <b>6.25</b>   | 1     | <b>3.83</b>  | CRO     |
|                      |                  |              | 505  | 0.07  | 0.13        | 1         | 1.98         | 1           | 1.6           | 1     | <b>11.96</b>  | 1     | <b>6.52</b>  | UC      |
| 10p11.23             | <i>MARPK8</i>    | ILMN_1741159 | 124  | 0.95  | 0           | 0.95      | 0            | 0.82        | 0.66          | 0.82  | 0.93          | 0.02  | 0.43         | CRO     |
| 10q21.1              | <i>CISD1</i>     | ILMN_2122952 | 538  | 1     | 0           | 1         | 0            | 1           | 0             | 1     | 0             | 1     | 0            | CRO     |
|                      |                  | ILMN_2122953 | 538  | 0.74  | 0.01        | 1         | 0            | 1           | 0             | 1     | 0             | 1     | 0            | CRO     |
| 10q21.2              | <i>ADO</i>       | ILMN_1690352 | 417  | 0.97  | 1.66        | 0.99      | 0.01         | <b>0.96</b> | <b>4.88</b>   | 1     | 0             | 0.39  | 0.07         | CRO     |
|                      |                  |              | 402  | 0.93  | 0           | 0.98      | 0            | 0.81        | 0.01          | 1     | 0             | 0.36  | 0.04         | UC      |
| 11q23.3              | <i>C11orf60</i>  | ILMN_1677080 | 338  | 0.03  | 0.23        | 0.13      | 0.09         | 0.85        | 0             | 0.23  | 0.02          | 1     | 0            | CEL     |
|                      |                  |              | 426  | 0.04  | 0.19        | 0.17      | 0.13         | 0.87        | 0             | 0.23  | 0.02          | 1     | 0            | MS      |
|                      | <i>TMEM25</i>    | ILMN_1651745 | 338  | 1     | 0           | 0.03      | 0.2          | 0.05        | 0.13          | 0.05  | 0.15          | 0.04  | 0.27         | CEL     |
|                      |                  |              | 426  | 1     | 0           | 0.04      | 0.21         | 0.05        | 0.11          | 0.07  | 0.13          | 0.04  | 0.25         | MS      |
| 12p13.31             | <i>TRAPPC4</i>   | ILMN_1814650 | 435  | 0.43  | 0.01        | 1         | 0            | 1           | 0             | 0.2   | 0.05          | 0.98  | 0            | MS      |
|                      | <i>LTBR</i>      | ILMN_1667476 | 49   | 0.01  | 1.46        | 1         | 1            | 1           | 0             | 1     | 0             | 1     | 0            | MS      |
|                      |                  |              | 50   | 0.01  | 1.43        | 1         | <b>8.52</b>  | 1           | <b>3.65</b>   | 1     | <b>4.43</b>   | 1     | <b>4.65</b>  | PBC     |
|                      | <i>CLEC2D</i>    | ILMN_1693781 | 580  | 1     | 1.84        | 0.05      | 0.22         | 0.05        | 0.11          | 0.08  | 0.12          | 0.05  | 0.16         | MS      |
|                      |                  |              | 552  | 0.91  | 0.04        | 0.04      | 0.11         | 0.04        | 0.11          | 0.08  | 0.32          | 0.04  | 0.15         | T1D     |
|                      | <i>CLECL1</i>    | ILMN_1782729 | 580  | 1     | 0.06        | 1         | 0.18         | 1           | 0.09          | 1     | 0.22          | 1     | 0.22         | MS      |
|                      |                  |              | 552  | 0.92  | 0.17        | 0.94      | 0.63         | 0.94        | 0.63          | 0.94  | 0.58          | 0.94  | 0.57         | T1D     |
|                      |                  |              | 580  | 0.07  | 0.09        | 0.1       | 0.25         | 0.05        | 0.12          | 1     | 0             | 0.06  | 0.19         | MS      |
|                      | <i>LOC728715</i> | ILMN_1749875 | 552  | 0.07  | 0.16        | 0.07      | 0.1          | 0.04        | 0.12          | 0.9   | 0             | 0.05  | 0.11         | T1D     |
|                      |                  |              | 258  | 1     | 0.65        | 1         | 0.65         | 1           | 0.65          | 1     | 0.66          | 1     | 0.65         | T1D     |
| 12q13.2              | <i>RPS26</i>     | ILMN_2209027 | 609  | 1     | <b>3.57</b> | 1         | <b>4.05</b>  | 1           | <b>3.72</b>   | 1     | <b>3.33</b>   | 1     | 2.31         | MS      |
| 12q14.1              | <i>FAM119B</i>   | ILMN_1723846 | 609  | 0.07  | 0.23        | 0.05      | 0.08         | 1           | 2.85          | 0.79  | 2.34          | 1     | 2.86         | MS      |
|                      | <i>METTL1</i>    | ILMN_1815190 | 609  | 1     | 0           | 1         | 0            | 1           | 0             | 1     | 0             | 1     | 0            | MS      |
|                      | <i>XRCC6BP1</i>  | ILMN_1767481 | 609  | 1     | 0           | 1         | 0            | 1           | 0             | 1     | 0             | 1     | 0            | MS      |
| 12q24.31             | <i>LOC728069</i> | ILMN_1668743 | 415  | 0.93  | 0           | 0.93      | 0            | 0.15        | 0.03          | 0.26  | 0.08          | 0.93  | 0            | MS      |
| 13q14.11             | <i>AKAP11</i>    | ILMN_1693320 | 456  | 0.05  | 0.13        | 0.08      | 1.14         | 1           | 0             | 0.08  | 0.7           | 0.79  | 0            | CRO     |
| 14q13.2              | <i>FAM177A1</i>  | ILMN_2287276 | 700  | 0.05  | 0.13        | 0.91      | 0            | 0.91        | 0             | 0.91  | 0             | 0.91  | 0            | PS      |
| 14q13.2              | <i>KIAA0391</i>  | ILMN_1701512 | 700  | 0.52  | 0.01        | 0.91      | 0            | 0.07        | 0.22          | 0.07  | 0.27          | 0.91  | 0            | PS      |
| 15q25.1              | <i>CTSH</i>      | ILMN_2390853 | 279  | 1     | 0           | 1         | <b>99</b>    | 1           | <b>96.12</b>  | 1     | <b>95.19</b>  | 1     | <b>99</b>    | NAR     |
|                      |                  |              | 325  | 1     | 0           | 1         | <b>32.01</b> | 1           | <b>141.45</b> | 1     | <b>303.04</b> | 1     | <b>32.33</b> | T1D     |
| 16p13.13             | <i>C16orf75</i>  | ILMN_1790537 | 871  | 1     | 0           | 0.15      | 0.03         | 1           | 0             | 1     | 0             | 1     | 0            | PBC     |
|                      |                  |              | 884  | 1     | 0           | 0.16      | 0.03         | 1           | 0             | 1     | 0             | 1     | 0            | MS      |
|                      |                  |              | 866  | 1     | 0           | 0.16      | 0.02         | 1           | 0             | 1     | 0             | 1     | 0            | T1D     |
|                      |                  |              | 805  | 1     | 0           | 0.18      | 0.06         | 1           | 0             | 1     | 0             | 1     | 0            | PS      |
|                      |                  |              | 390  | 1     | 0           | 0.15      | 0.04         | 1           | 0             | 1     | 0             | 1     | 0            | CRO     |
|                      | <i>DEXI</i>      | ILMN_1738866 | 871  | 0.41  | 0.02        | 1         | 0            | 1           | 0.02          | 1     | 0             | 1     | 0            | PBC     |
|                      |                  |              | 884  | 0.4   | 0.04        | 1         | 0            | 1           | 0.15          | 1     | 0             | 1     | 0            | MS      |
|                      |                  |              | 866  | 0.4   | 0.04        | 1         | 0            | 1           | 0.06          | 1     | 0             | 1     | 0            | T1D     |
|                      |                  |              | 805  | 0.26  | 0.03        | 1         | 0            | 1           | 0             | 1     | 0             | 1     | 0            | PS      |
| 16p11.2              | <i>ITGAX</i>     | ILMN_2254635 | 486  | 0.07  | 0.1         | 0.98      | 0            | 0.07        | 0.25          | 0.05  | 0.13          | 0.05  | 0.11         | PS      |
|                      |                  |              | 344  | 0.07  | 0.15        | 0.98      | 0            | 0.06        | 0.21          | 0.04  | 0.34          | 0.04  | 0.25         | ATD     |

Continued on next page

| Supplementary Table 1 – continued from previous page | Region   | Gene            | Probe        | SNPs |         | Coloc |       | Monocytes |       | IFN24 |       | LPS2  |       | LPS24 |       | Disease |
|------------------------------------------------------|----------|-----------------|--------------|------|---------|-------|-------|-----------|-------|-------|-------|-------|-------|-------|-------|---------|
|                                                      |          |                 |              | SNPs | B cells | Assoc | Coloc | Assoc     | Coloc | Assoc | Coloc | Assoc | Coloc | Assoc | Coloc |         |
|                                                      |          | <i>SEPHS2</i>   | ILMN_1687824 | 486  | 0.06    | 0.17  | 0.04  | 0.17      | 0.98  | 0     | 0.04  | 0.14  | 0.04  | 0.16  |       | PS      |
|                                                      | 16q12.1  | <i>NOD2</i>     | ILMN_1762594 | 181  | 0.02    | 0.44  | 1     | 0         | 0.28  | 0.02  | 0.96  | 0     | 0.13  | 0.04  |       | CRO     |
|                                                      |          | <i>SNX20</i>    | ILMN_1798612 | 181  | 0.02    | 0.56  | 1     | 0         | 0.03  | 0.24  | 0.08  | 0.08  | 1     | 0     |       | CRO     |
|                                                      | 17q11.2  | <i>KSR1</i>     | ILMN_1754798 | 406  | 0.05    | 0.42  | 0.87  | 0         | 0.04  | 0.25  | 0.05  | 0.24  | 1     | 0     |       | PS      |
|                                                      |          | <i>LGALS9</i>   | ILMN_1715760 | 406  | 0.14    | 0.08  | 1     | 0         | 1     | 0     | 1     | 0     | 0.1   | 0.1   |       | PS      |
|                                                      |          |                 | ILMN_2412214 | 406  | 0.84    | 0     | 1     | 0         | 1     | 0     | 0.98  | 0     | 0.15  | 0.06  |       | PS      |
|                                                      | 17q12    | <i>CRKRS</i>    | ILMN_1707448 | 858  | 0.07    | 0.07  | 1     | 0         | 1     | 0     | 1     | 0     | 1     | 0     |       | PBC     |
|                                                      |          |                 |              | 868  | 0.07    | 0.07  | 1     | 0         | 1     | 0     | 1     | 0     | 1     | 0     |       | CRO     |
|                                                      |          |                 |              | 822  | 0.06    | 0.08  | 0.96  | 0         | 0.96  | 0     | 0.96  | 0     | 0.96  | 0     |       | RA      |
|                                                      |          |                 |              | 870  | 0.07    | 0.07  | 1     | 0         | 1     | 0     | 1     | 0     | 1     | 0     |       | UC      |
|                                                      |          | <i>GSDMA</i>    | ILMN_1776115 | 858  | 0.07    | 0.09  | 0.06  | 0.08      | 1     | 0     | 1     | 0     | 1     | 0     |       | PBC     |
|                                                      |          |                 |              | 868  | 0.07    | 0.08  | 0.06  | 0.07      | 1     | 0     | 1     | 0     | 1     | 0     |       | CRO     |
|                                                      |          |                 |              | 822  | 0.06    | 0.08  | 0.06  | 0.08      | 0.96  | 0     | 0.96  | 0     | 0.96  | 0     |       | RA      |
|                                                      |          |                 |              | 870  | 0.07    | 0.08  | 0.06  | 0.07      | 1     | 0     | 1     | 0     | 1     | 0     |       | UC      |
|                                                      | 17q21.2  | <i>CNTNAP1</i>  | ILMN_1692398 | 392  | 1       | 0     | 0.05  | 0.33      | 0.03  | 0.2   | 0.03  | 0.2   | 0.05  | 0.13  |       | MS      |
|                                                      |          |                 |              | 397  | 1       | 0     | 0.05  | 0.19      | 0.03  | 0.25  | 0.03  | 0.2   | 0.05  | 0.12  |       | CRO     |
|                                                      |          |                 |              | 397  | 0.93    | 0     | 0.05  | 0.49      | 0.03  | 0.2   | 0.03  | 0.2   | 0.05  | 0.12  |       | UC      |
|                                                      | 19p13.3  | <i>GPX4</i>     | ILMN_1734353 | 179  | 0.95    | 0.15  | 1     | 0         | 0.03  | 0.27  | 0.05  | 0.14  | 0.04  | 0.19  |       | CRO     |
|                                                      |          |                 | ILMN_2378952 | 179  | 0.63    | 0.23  | 1     | 0         | 0.04  | 0.18  | 0.03  | 0.25  | 0.04  | 0.2   |       | CRO     |
|                                                      | 19p13.2  | <i>ICAM3</i>    | ILMN_2212763 | 246  | 0.04    | 0.75  | 1     | 0         | 0.16  | 0.06  | 0.04  | 0.36  | 0.06  | 0.15  |       | PBC     |
|                                                      |          |                 |              | 258  | 0.04    | 0.53  | 1     | 0         | 0.16  | 0.05  | 0.05  | 0.34  | 0.06  | 0.14  |       | CRO     |
|                                                      |          |                 |              | 258  | 0.04    | 0.51  | 0.99  | 0         | 0.16  | 0.06  | 0.05  | 0.35  | 0.06  | 0.15  |       | MS      |
|                                                      |          |                 |              | 237  | 0.04    | 0.58  | 1     | 0         | 0.16  | 0.05  | 0.04  | 0.37  | 0.06  | 0.15  |       | RA      |
|                                                      |          |                 |              | 235  | 0.03    | 0.56  | 1     | 0         | 0.16  | 0.06  | 0.04  | 0.3   | 0.06  | 0.15  |       | PS      |
|                                                      |          |                 |              | 254  | 0.03    | 0.4   | 0.99  | 0         | 0.17  | 0.13  | 0.04  | 0.22  | 0.06  | 0.2   |       | UC      |
|                                                      |          | <i>ICAM4</i>    | ILMN_1681296 | 240  | 0.04    | 0.62  | 1     | 0         | 0.16  | 0.05  | 0.04  | 0.27  | 0.06  | 0.15  |       | T1D     |
|                                                      |          |                 |              | 246  | 0.03    | 0.46  | 1     | 0         | 0.12  | 0.06  | 0.99  | 0     | 1     | 0     |       | PBC     |
|                                                      |          |                 |              | 258  | 0.03    | 0.39  | 1     | 0         | 0.1   | 0.08  | 0.99  | 0     | 1     | 0     |       | CRO     |
|                                                      |          |                 |              | 258  | 0.03    | 0.39  | 0.99  | 0         | 0.1   | 0.08  | 0.99  | 0     | 0.99  | 0     |       | MS      |
|                                                      |          |                 |              | 237  | 0.03    | 0.44  | 1     | 0         | 0.1   | 0.08  | 0.99  | 0     | 1     | 0     |       | RA      |
|                                                      |          |                 |              | 235  | 0.03    | 0.51  | 1     | 0         | 0.1   | 0.08  | 0.99  | 0     | 1     | 0     |       | PS      |
|                                                      |          |                 |              | 254  | 0.03    | 0.29  | 0.99  | 0         | 0.1   | 0.06  | 0.98  | 0     | 0.99  | 0     |       | UC      |
|                                                      |          |                 |              | 240  | 0.03    | 0.43  | 1     | 0         | 0.1   | 0.08  | 0.99  | 0     | 1     | 0     |       | T1D     |
|                                                      |          |                 | ILMN_2393067 | 246  | 0.03    | 0.53  | 1     | 0         | 0.03  | 0.38  | 0.05  | 0.21  | 0.69  | 0     |       | PBC     |
|                                                      |          |                 |              | 258  | 0.04    | 0.52  | 1     | 0         | 0.03  | 0.34  | 0.05  | 0.21  | 0.71  | 0     |       | CRO     |
|                                                      |          |                 |              | 258  | 0.03    | 0.49  | 0.99  | 0         | 0.03  | 0.34  | 0.05  | 0.19  | 0.7   | 0     |       | MS      |
|                                                      |          |                 |              | 237  | 0.03    | 0.56  | 1     | 0         | 0.03  | 0.37  | 0.05  | 0.22  | 0.71  | 0     |       | RA      |
|                                                      |          |                 |              | 235  | 0.03    | 0.45  | 1     | 0         | 0.03  | 0.37  | 0.05  | 0.2   | 0.68  | 0     |       | PS      |
|                                                      |          |                 |              | 254  | 0.03    | 0.44  | 0.99  | 0         | 0.03  | 0.29  | 0.07  | 0.62  | 0.69  | 0     |       | UC      |
|                                                      |          |                 |              | 240  | 0.03    | 0.54  | 1     | 0         | 0.03  | 0.39  | 0.05  | 0.22  | 0.67  | 0     |       | T1D     |
|                                                      | 19p13.11 | <i>IFI30</i>    | ILMN_1807277 | 317  | 0.88    | 0.01  | 1     | 0         | 1     | 0     | 1     | 0     | 1     | 0     |       | MS      |
|                                                      |          | <i>KIAA1683</i> | ILMN_2158003 | 317  | 0.88    | 0.01  | 1     | 0         | 1     | 0     | 1     | 0     | 1     | 0     |       | MS      |

Continued on next page

Supplementary Table 1 – continued from previous page

| Region   | Gene         | Probe           | SNPs         |       | B cells |       | Monocytes |       | IFN24 |       | LPS2  |       | LPS24 |      | Disease |      |    |
|----------|--------------|-----------------|--------------|-------|---------|-------|-----------|-------|-------|-------|-------|-------|-------|------|---------|------|----|
|          |              |                 | Assoc        | Coloc | Assoc   | Coloc | Assoc     | Coloc | Assoc | Coloc | Assoc | Coloc |       |      |         |      |    |
| 20q13.12 | <i>SIRPD</i> | ILMN_1769886    | 352          | 0.04  | 0.17    | 0.98  | 0         | 0.98  | 0     | 0.98  | 0     | 0.98  | 0     | 0.98 | 0       | TTD  |    |
|          |              | ILMN_1702911    | 169          | 1     | 0       | 0.02  | 0.33      | 0.03  | 0.23  | 0.02  | 0.36  | 0.02  | 0.25  | 0.25 | UC      |      |    |
|          |              | ILMN_1796627    | 169          | 1     | 0       | 0.03  | 0.19      | 0.02  | 0.32  | 0.04  | 1.41  | 0.02  | 0.42  | 0.42 | UC      |      |    |
|          | <i>TPPAL</i> | ILMN_2406169    | 169          | 1     | 0       | 0.01  | 0.25      | 0.02  | 0.75  | 0.03  | 0.68  | 0.02  | 0.27  | 0.27 | UC      |      |    |
|          |              | ILMN_2364131    | 169          | 0.97  | 0       | 1     | 0         | 0.04  | 0.15  | 0.02  | 0.29  | 0.94  | 0     | 0    | UC      |      |    |
|          |              | ILMN_1779257    | 372          | 0.04  | 0.16    | 1     | 0         | 0.1   | 0.13  | 0.55  | 0.19  | 1     | 0     | 0    | CRO     |      |    |
|          | 20q13.33     | <i>TNFRSF6B</i> | ILMN_2367818 | 372   | 1       | 0     | 1         | 0     | 0.57  | 0.01  | 0.08  | 0.34  | 0.77  | 2.7  | 2.7     | CRO  |    |
|          |              |                 | ILMN_1661825 | 319   | 0.03    | 0.22  | 0.04      | 0.14  | 1     | 0     | 0.03  | 0.18  | 0.03  | 0.2  | 0.2     | CRO  |    |
|          |              |                 | ILMN_1794643 | 319   | 0.03    | 0.38  | 0.03      | 0.21  | 0.87  | 0     | 0.03  | 0.39  | 0.03  | 0.28 | 0.28    | UC   |    |
|          | 21q22.3      | <i>C21orf33</i> | ILMN_1737588 | 173   | 0.12    | 0.11  | 0.92      | 0     | 0.03  | 0.21  | 0.03  | 0.44  | 0.03  | 0.19 | 0.19    | UC   |    |
|          |              |                 | ILMN_2331232 | 319   | 0.04    | 0.44  | 0.09      | 0.31  | 1     | 0     | 0.03  | 0.27  | 0.03  | 0.34 | 0.34    | UC   |    |
|          |              |                 | ILMN_2331231 | 319   | 0.03    | 0.27  | 0.88      | 0.05  | 0.87  | 0     | 0.04  | 0.41  | 0.06  | 0.24 | 0.24    | CRO  |    |
| 22q12.2  |              | <i>MTMR3</i>    | ILMN_1803925 | 820   | 0.28    | 0.02  | 1         | 0     | 0.98  | 0     | 0.12  | 0.05  | 1     | 0    | 0       | TTD  |    |
|          |              |                 | ILMN_2366714 | 820   | 0.3     | 0.04  | 1         | 0     | 0.98  | 0     | 0.12  | 0.11  | 1     | 1    | 0       | CRO  |    |
|          |              |                 | ILMN_2366714 | 850   | 0.91    | 0.01  | 1         | 0     | 0.59  | 0.01  | 0.65  | 0.41  | 1     | 1    | 0       | UC   |    |
| 22q13.1  |              | <i>PDGFB</i>    | ILMN_1737695 | 192   | 0.02    | 0.44  | 0.03      | 0.32  | 1     | 1     | 0.55  | 1     | 2.39  | 0.1  | 1.43    | UC   |    |
|          |              |                 | ILMN_1775822 | 192   | 0.02    | 0.46  | 0.01      | 0.46  | 1     | 1     | 0.73  | 1     | 0.46  | 0.1  | 1.28    | PBC  |    |
|          |              |                 | ILMN_1775822 | 192   | 0.02    | 0.44  | 0.01      | 0.43  | 1     | 1     | 0.18  | 1     | 0.17  | 1    | 0.19    | UC   |    |
|          |              | <i>SYNGR1</i>   | ILMN_1727805 | 192   | 0.02    | 0.4   | 0.02      | 0.59  | 1     | 1     | 0.17  | 1     | 0.11  | 1    | 0       | CRO  |    |
|          |              |                 | ILMN_1810875 | 192   | 1       | 0     | 1         | 0.13  | 0.02  | 0.39  | 0.02  | 0.45  | 0.07  | 0.56 | 0.17    | 0.17 | UC |
|          |              |                 | ILMN_1810875 | 192   | 1       | 0     | 1         | 0     | 0.02  | 0.4   | 0.02  | 0.43  | 0.06  | 0.39 | 0.39    | PBC  |    |
|          | 22q13.33     | <i>CD40</i>     | ILMN_1810875 | 192   | 1       | 0     | 1         | 0     | 0.66  | 0.35  | 0.02  | 0.61  | 0.06  | 0.39 | 0.39    | UC   |    |
|          |              |                 | ILMN_1810875 | 192   | 1       | 0     | 1         | 0     | 0.67  | 0     | 0.19  | 0.09  | 0.85  | 0    | 0       | CRO  |    |
|          |              |                 | ILMN_1810875 | 191   | 1       | 0     | 1         | 0     | 0.68  | 0.01  | 0.19  | 0.15  | 0.84  | 0    | 0       | CRO  |    |
|          | 22q13.33     | <i>CD40</i>     | ILMN_1810875 | 191   | 1       | 0     | 1         | 0     | 0.68  | 0.01  | 0.19  | 0.1   | 0.83  | 0    | 0       | PBC  |    |
|          |              |                 | ILMN_1810875 | 191   | 1       | 0     | 1         | 0     | 0.68  | 0.01  | 0.19  | 0.1   | 0.83  | 0    | 0       | PBC  |    |
|          |              |                 | ILMN_1810875 | 191   | 1       | 0     | 1         | 0     | 0.68  | 0.01  | 0.19  | 0.1   | 0.83  | 0    | 0       | PBC  |    |
